# Supplementary material
Source: Research Square preprint supplement (doi:10.21203/rs.3.rs-9896344/v1)
Supplement: Supplementary file 1 [file 154582a4ee1d0042650d4321.pdf]

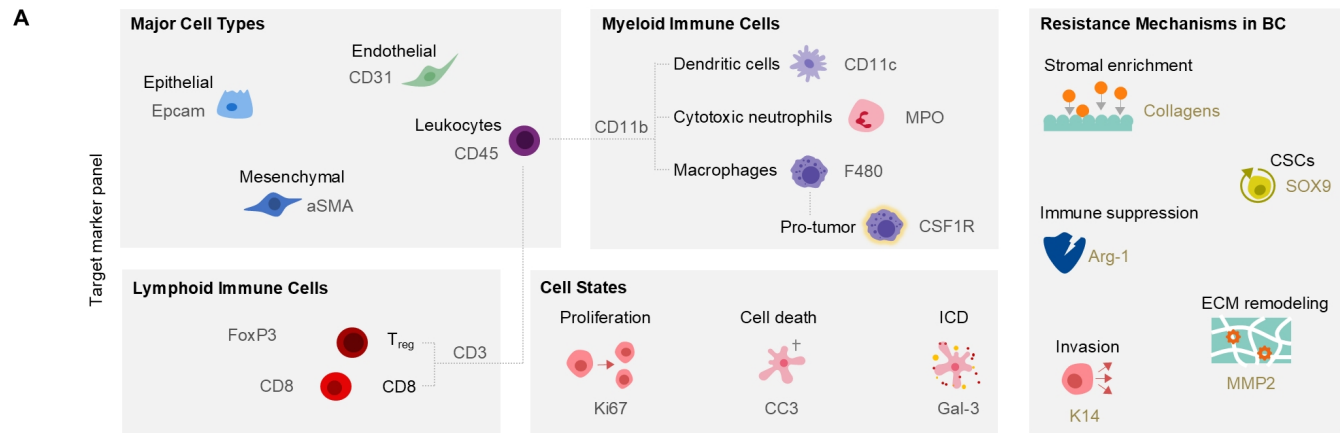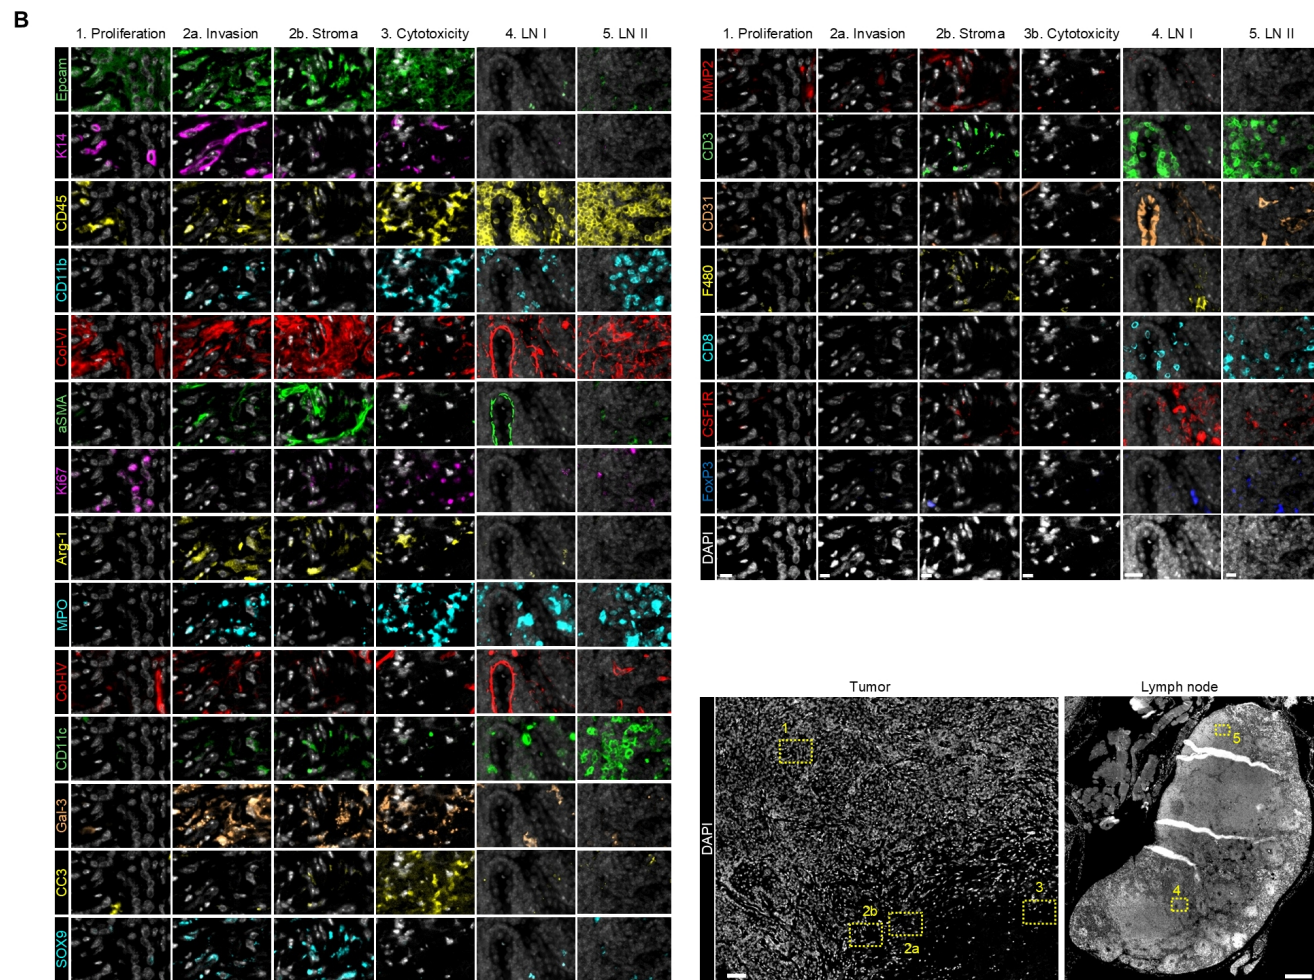

**Supplementary Figure 1 | Target marker panel and expression in MMTV-PyMT. A**, Protein targets of the cyclic immunofluorescence marker panel include key cell types, immune cell subclassification, breast cancer resistance mechanisms and response/cell status antibodies. **B**, Representative phenotype images of each marker in three regions from the panobinostat ROI (1.-3.) and comparison to lymph node phenotypes (4., 5.) For target marker expression in whole panobinostat vs control ROI and whole lymph node see Extended Data Image sequences. Scale bars: 5  $\mu$ m (1.-3.), 10  $\mu$ m (4., 5.), 50  $\mu$ m (tumor), 200  $\mu$ m (LN).

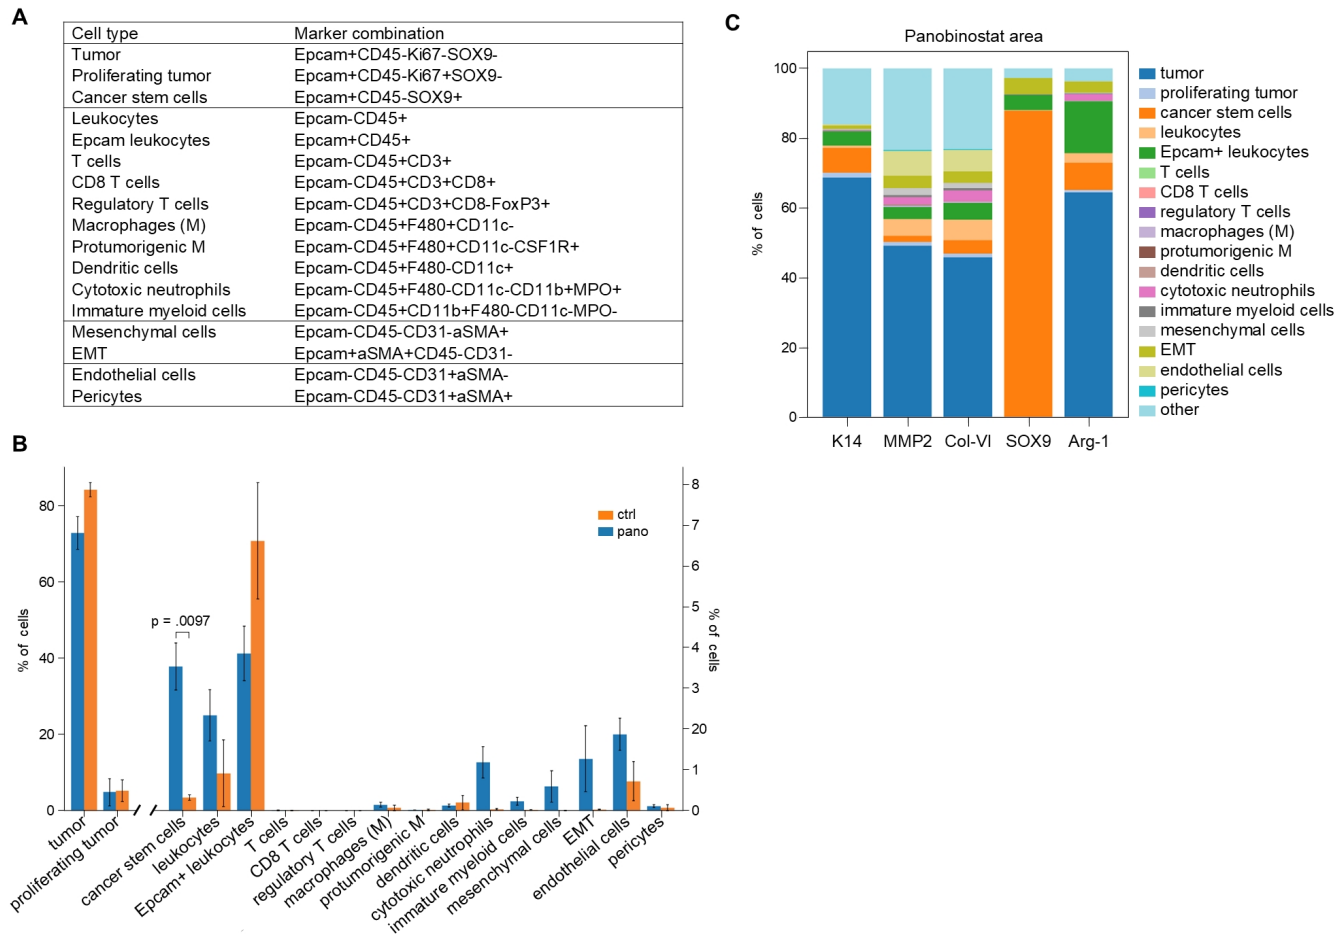

**Supplementary Figure 2 | Hierarchical gating and biology-based quantification of cell types.** **A**, Hierarchical gating strategy and marker combinations for standard cell type quantification. **B**, Mean standard cell type abundance in n=4 replicates upon local treatment compared to tumor bed using gating strategy from (A) presented as mean  $\pm$  standard error of mean. Statistical significance calculated using paired students t test. **C**, Mean standard cell type quantification of resistance marker-positive cells in the panobinostat assay area from n=4 replicates, using gating strategy from (a).

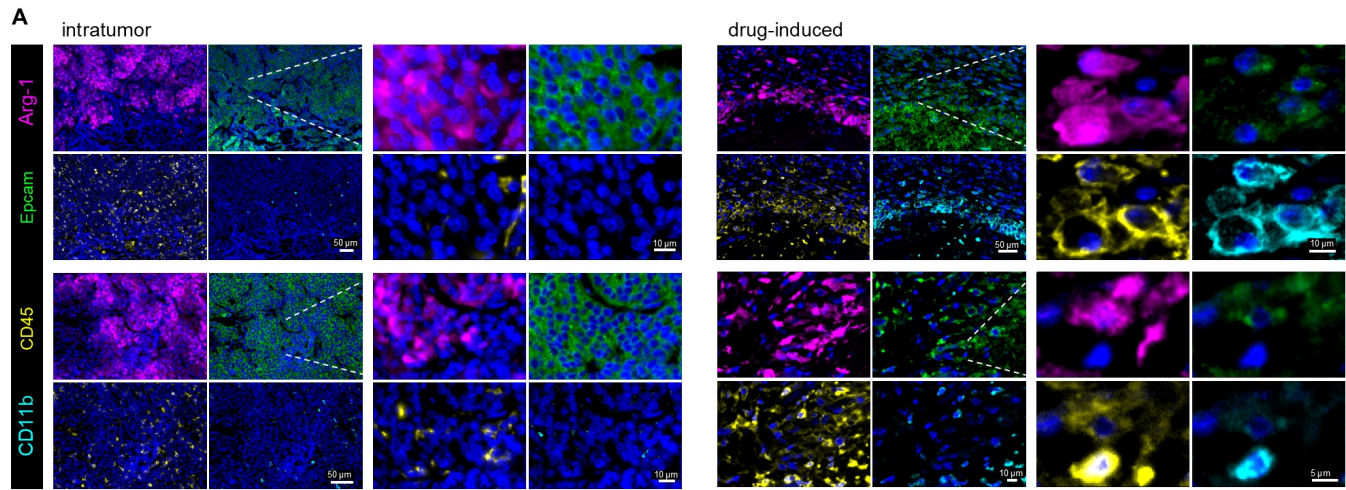

**Supplementary Figure 3 | Location-based differential expression of Arg-1. A,** Representative images of Arg-1 expression on Epcam+ tumor cells in the tumor bed (left) vs Arg-1 expression on myeloid cells in the drug-affected assay area (right, drug-induced).

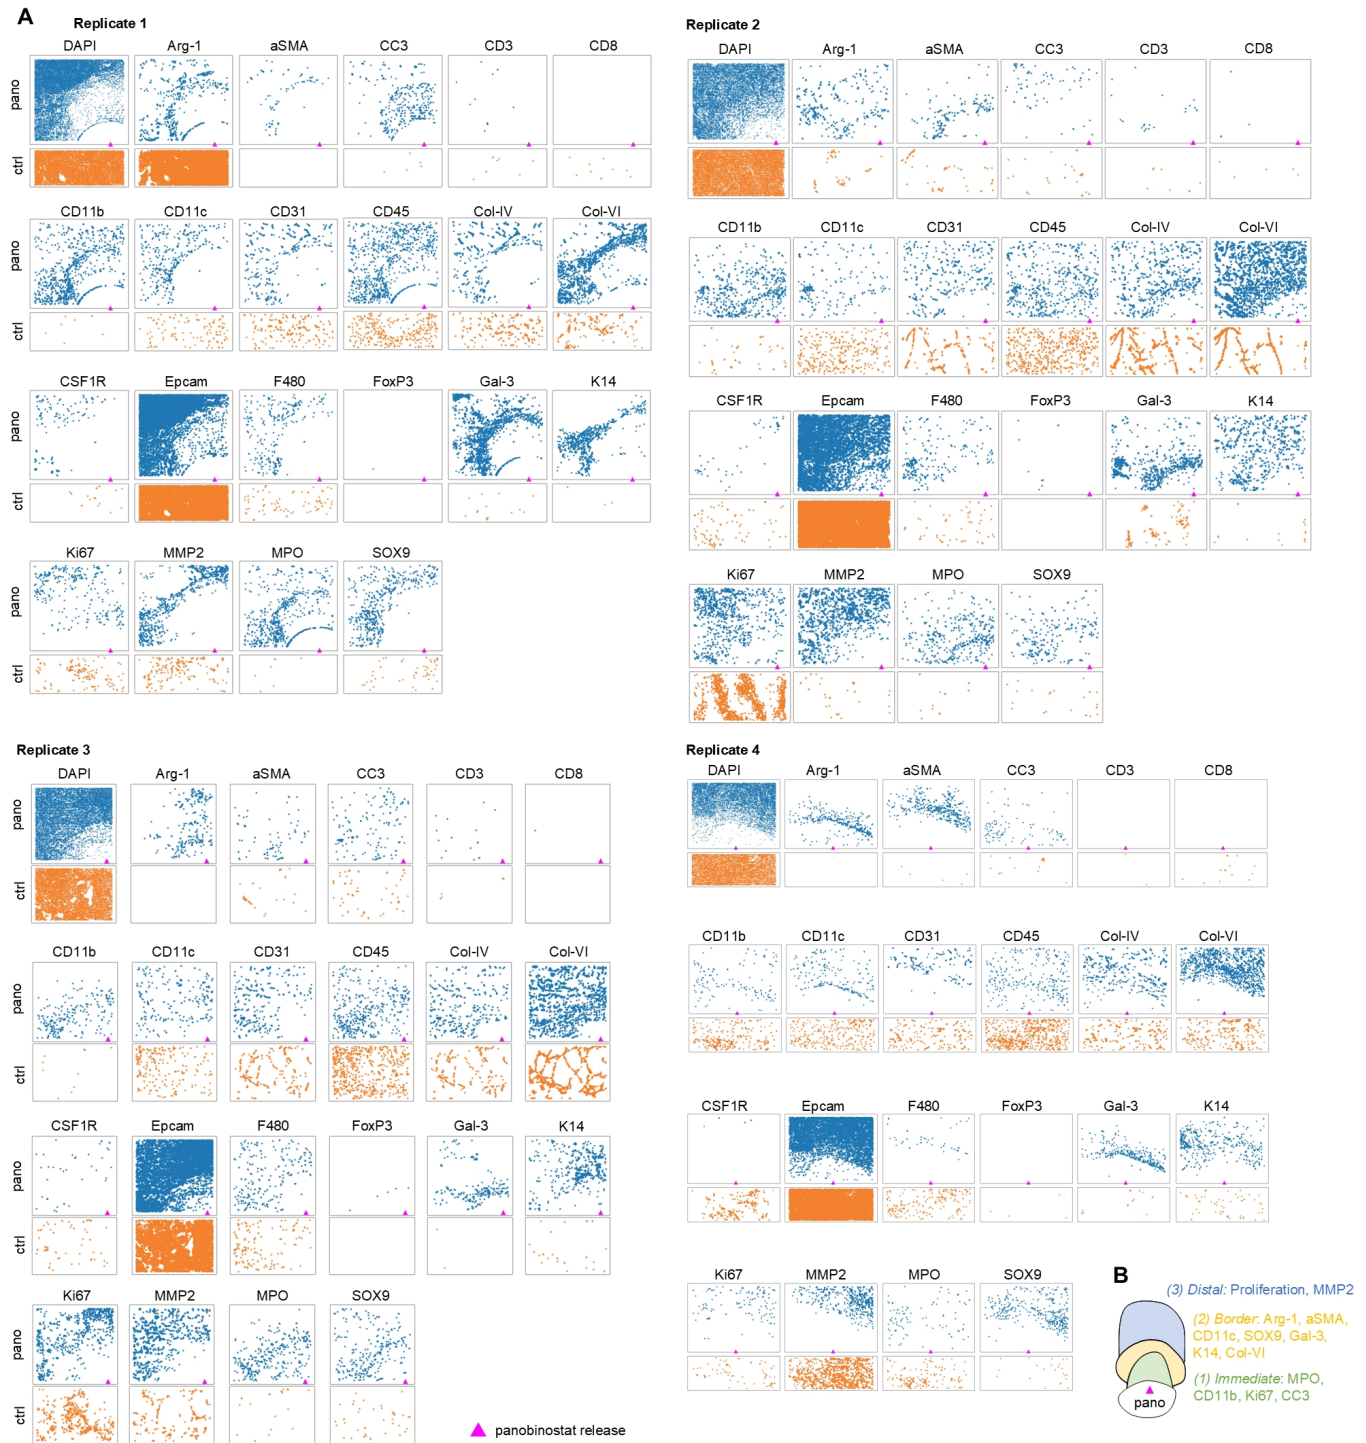

**Supplementary Figure 4 | Spatial target marker expression in layers. A**, Single-cell marker expression in xy space. Positive single-cell events for all individual markers per replicate, dots equal marker-positive cell. **B**, Schematic representation of cell phenotype separation into zones with distance from the panobinostat well. MPO<sup>+</sup> cytotoxic neutrophils are recruited into *immediate* proximity and this phenotype is halt by the *border* barrier composed of aSMA mesenchymal cells, CD11c dendritic cells, SOX9 cancer stem cells, Galectin-3, Arg-1 immune suppressive cells, K14 cells of invasive front and ECM deposition (Col-VI), the last two propagating into the *distal* zone. Proliferation and matrix remodeling (MMP2) are dominant markers in the *distal* zone.

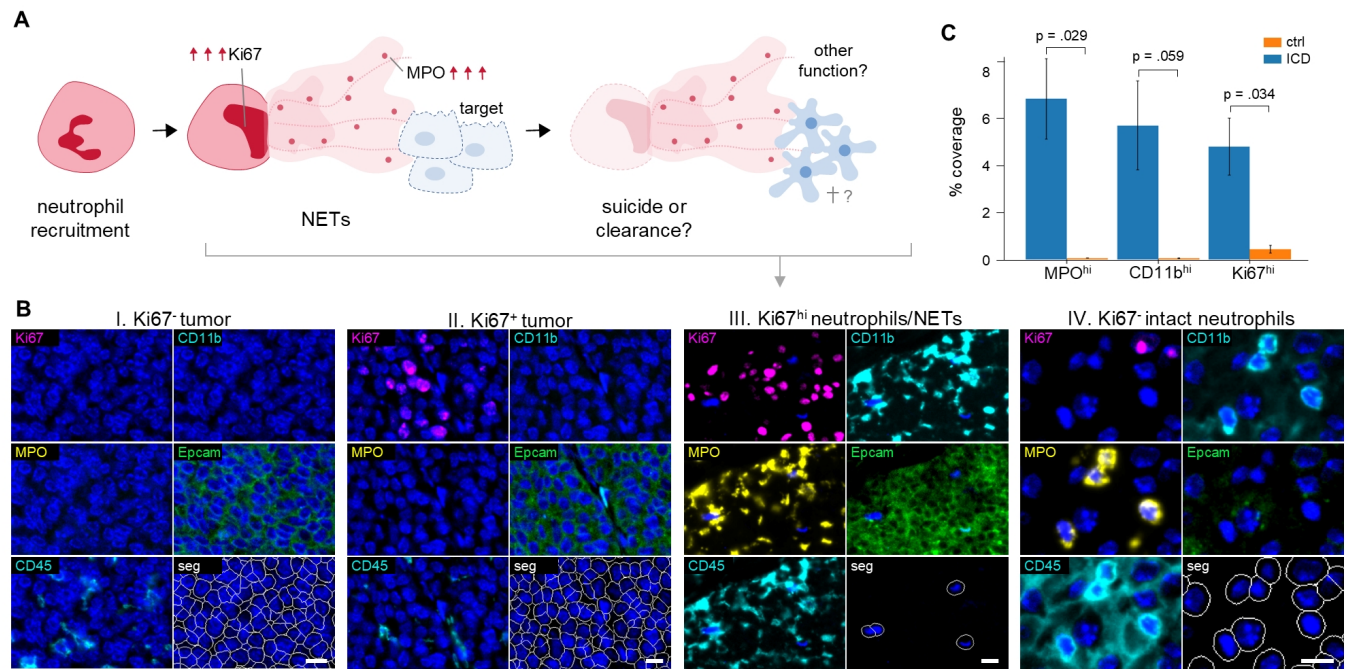

**Supplementary Figure 5 | Neutrophil extracellular trap (NET) formation with prolonged panobinostat exposure.** **A**, Schematics depicting NET formation. **B**, Representative images of Ki67<sup>-</sup> tumor, Ki67<sup>+</sup> tumor, Ki67<sup>hi</sup> neutrophils/NETs and Ki67<sup>-</sup> intact neutrophils using the same thresholds for each marker. White outlines (seg) and DAPI (blue) illustrate lack of segmentation of NETs in III. Scale bars: 10  $\mu$ m. **C**, Quantification of marker coverage (pixel value) of CD11b-positive and Ki67 and MPO-high signal in the representative cell death regions in the assay area vs intratumor control. The graph shows mean  $\pm$  s.e.m.; n = 4 wells and significance was calculated using paired sample students t-test. ICD: immunogenic cell death.

**A**

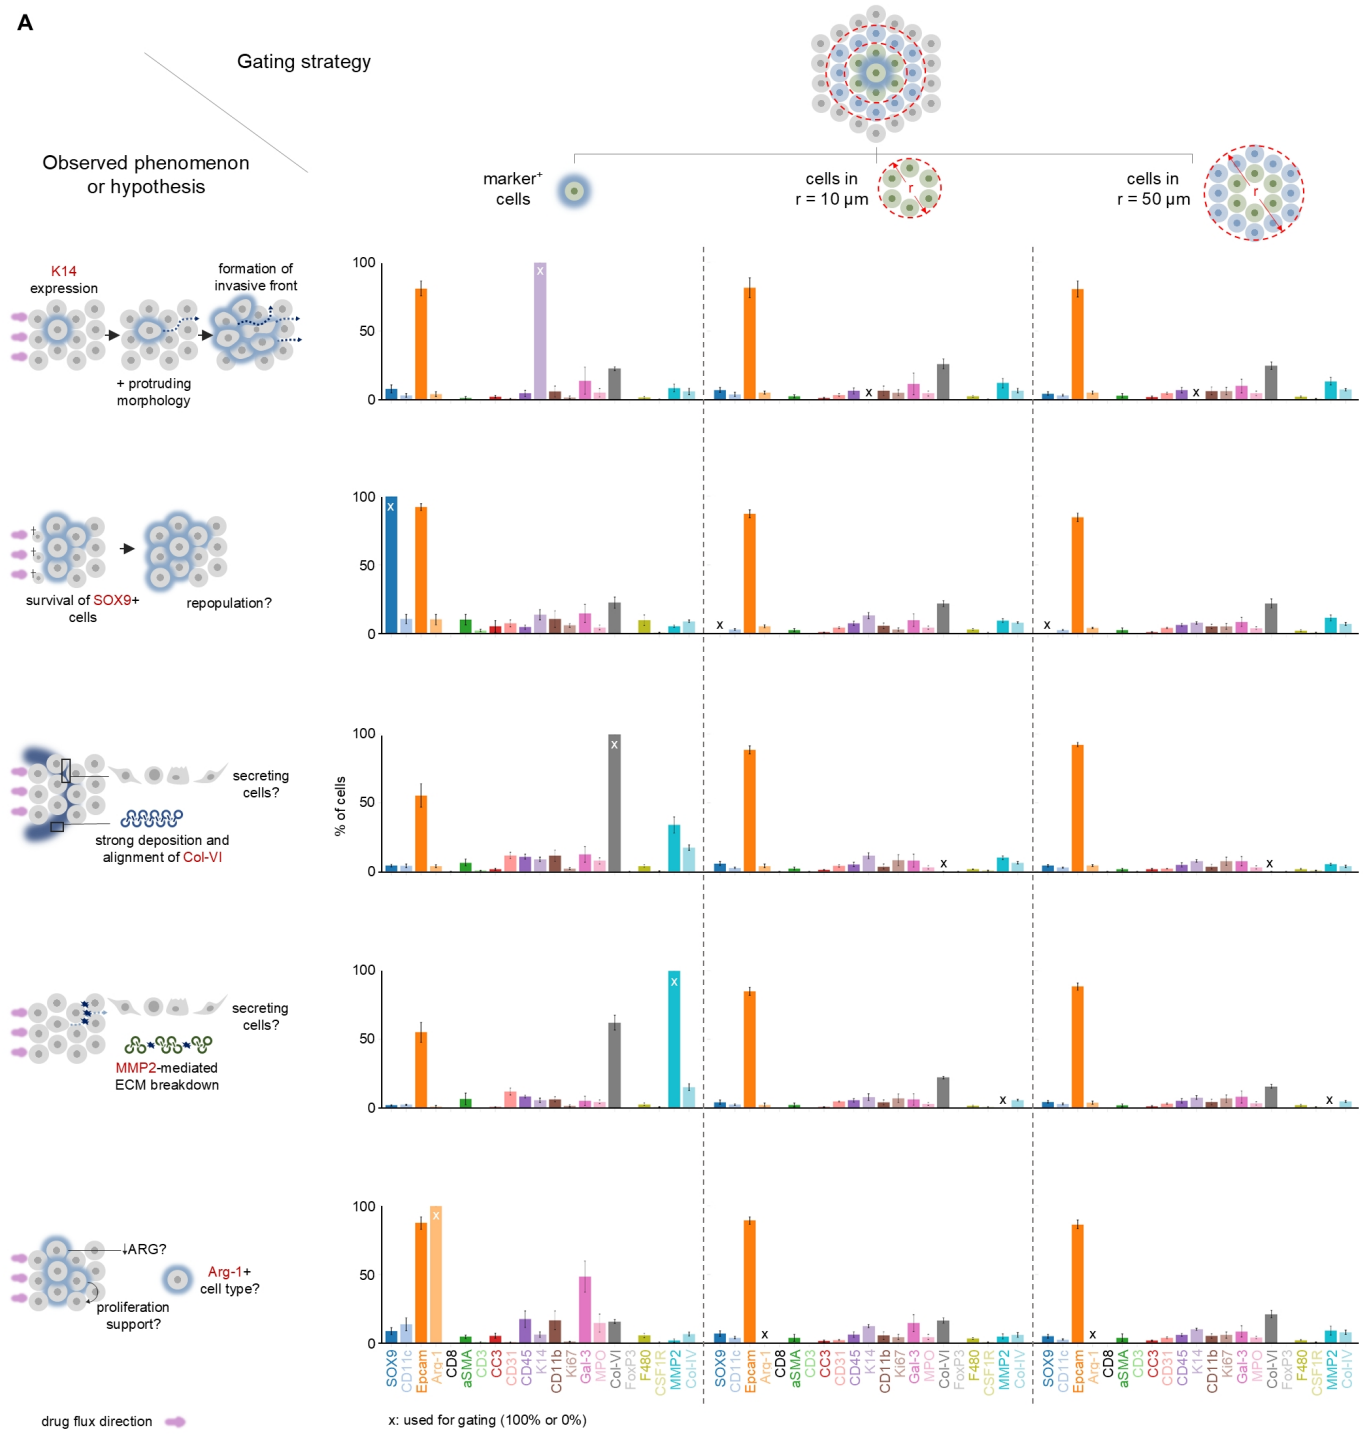

**B**

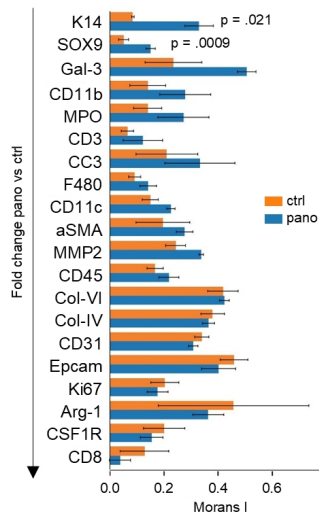

**Supplementary Figure 6 | Quantification of resistance biomarker events of positive cells, their immediate surrounding architecture and spatial variability.**

**A**, Resistance marker positive cells and their surrounding marker expression. Left panel: Observed phenomena and hypothesis in the assay area induced by the panobinostat release. Center to right panels: Quantification of biomarkers on resistance marker positive cells, and quantification of biomarkers on cells in immediate and intermediate proximity (10, 50  $\mu\text{m}$  radius, respectively) to resistance marker-positive cells. Total cell number given in graph itself, from n=4 replicates from two tumors. "x" in graphs denotes the marker used for gating. **B**, Absolute Morans I values from n = 4 replicates presented as mean  $\pm$  standard error of mean. Fold change between panobinostat area versus control intratumor presented in Fig. 2b. Significance was calculated using paired students t-test. FoxP3 marker was excluded due to scarce expression not allowing meaningful analysis.

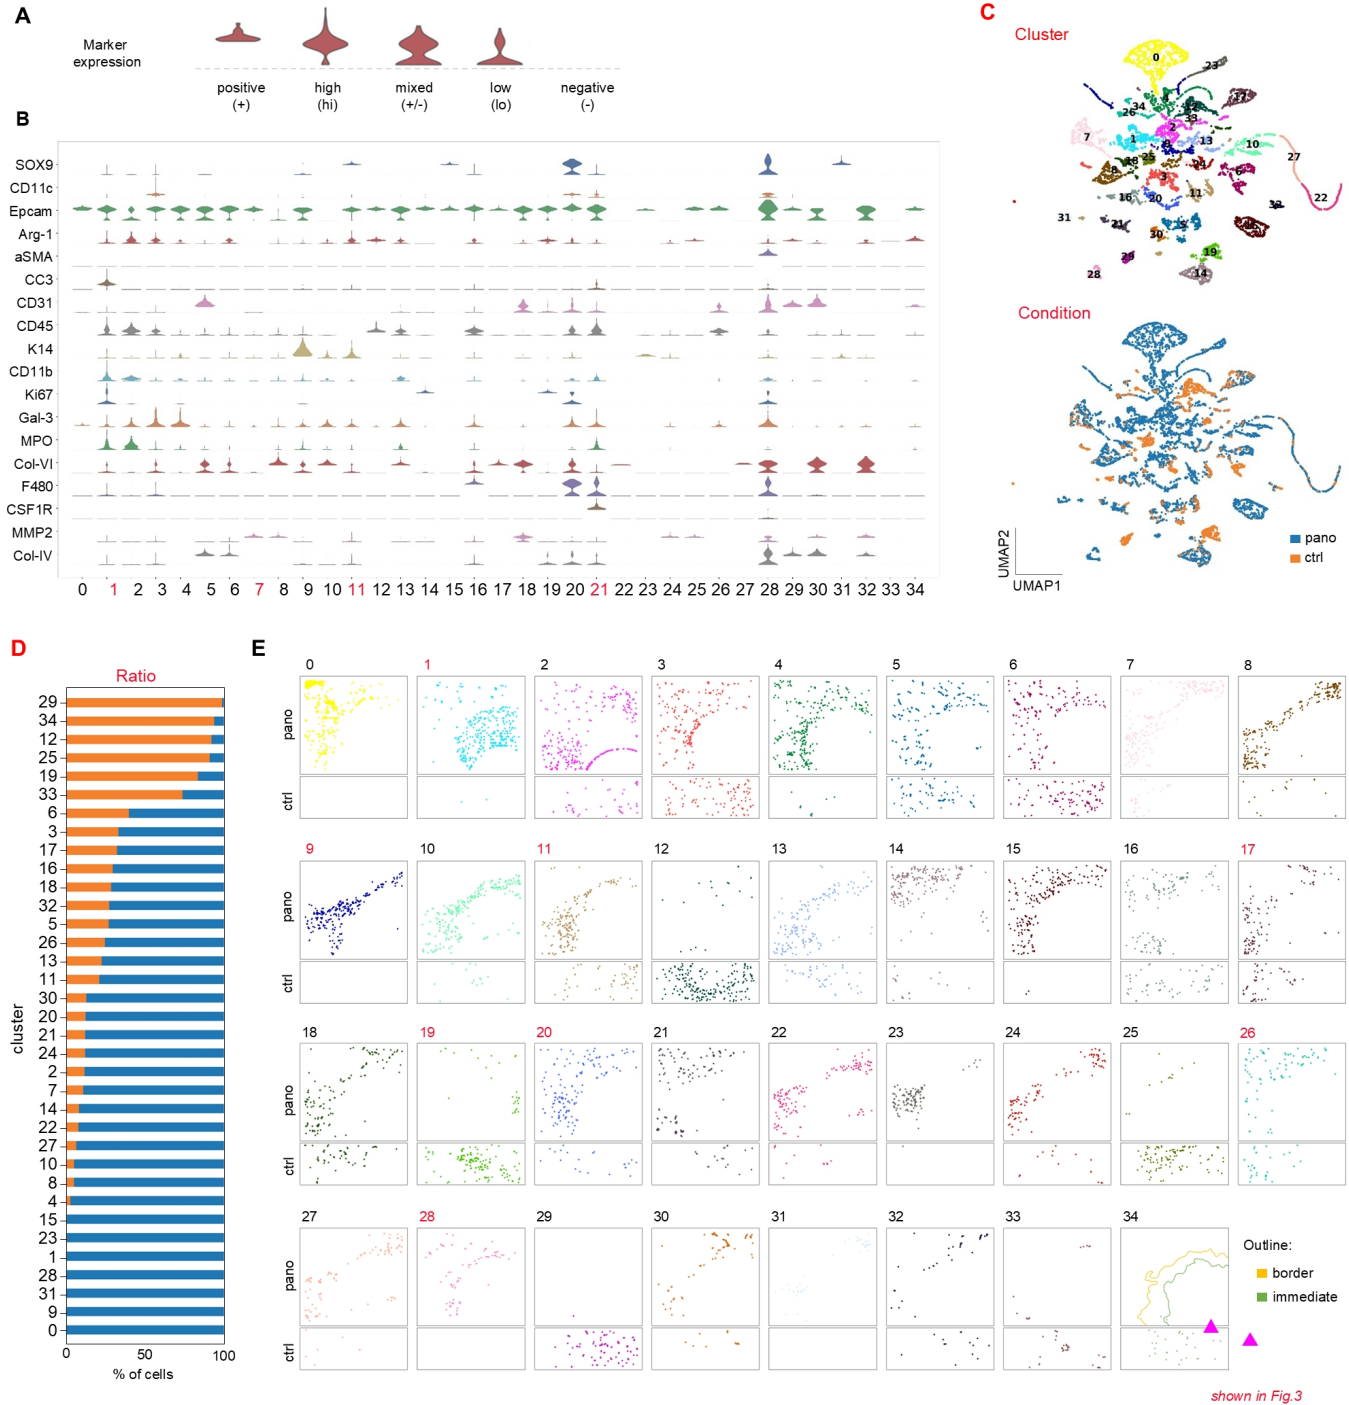

**Supplementary Figure 7 | Differential unsupervised clustering facilitated discovery of multi-marker combinations in replicate 1.** **A**, Annotation strategy for violin plots. **B**, Violin plot denoting marker expression in each cluster from unsupervised cluster analysis, for full annotation see Extended Data Table 2. **C**, UMAP representation colored by cluster (top) or condition (bottom). **D**, Cluster ratios between conditions for each cluster. **E**, Spatial representation of each cluster, top graph shows distribution in experimental area, bottom shows intratumor control. Parts of this figure are shown in Main Fig. 3, essential parts are highlighted in red.

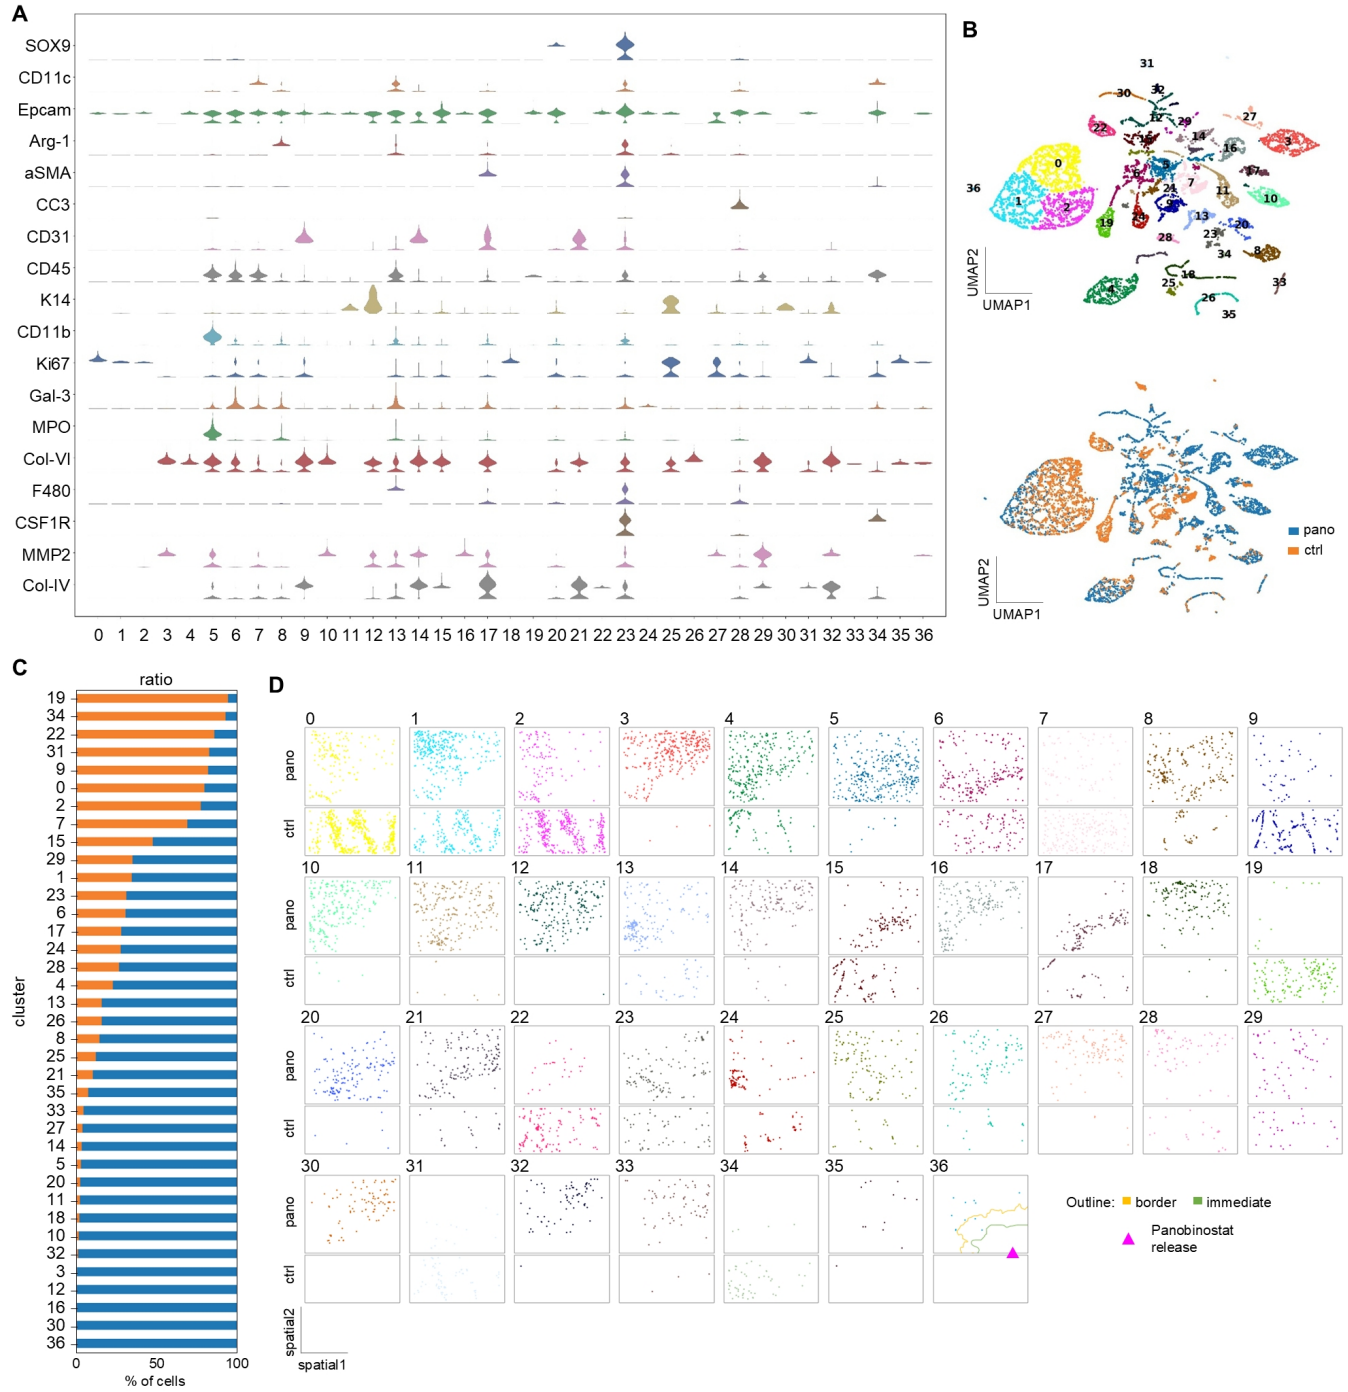

**Supplementary Figure 8 | Differential unsupervised clustering facilitated discovery of multi-marker combinations in replicate 2.** **A**, Violin plot denoting marker expression in each cluster from unsupervised cluster analysis, for full annotation see Extended Data Table 2. **B**, UMAP representation colored by cluster (top) or condition (bottom). **C**, Cluster ratios between conditions for each cluster. **D**, Spatial representation of each cluster, top graph shows distribution in experimental area, bottom shows intratumor control.

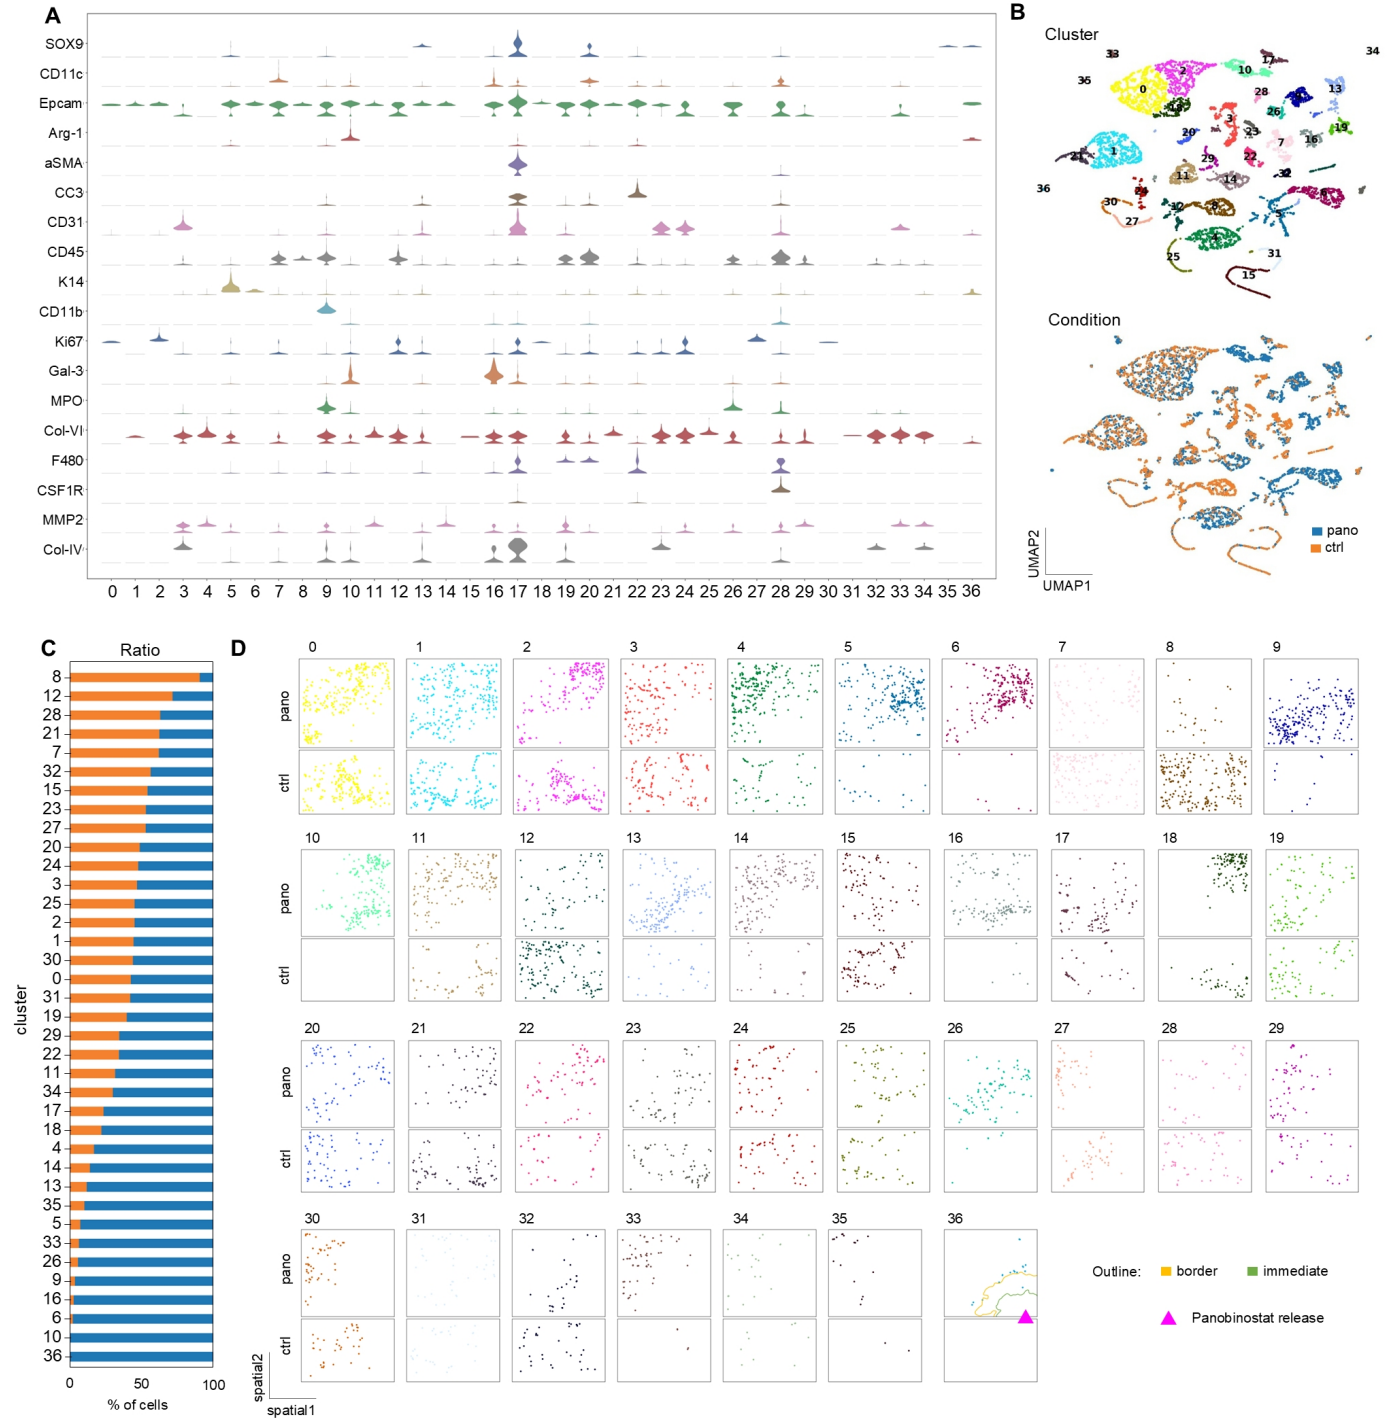

**Supplementary Figure 8 | Differential unsupervised clustering facilitated discovery of multi-marker combinations in replicate 3.** **A**, Violin plot denoting marker expression in each cluster from unsupervised cluster analysis, for full annotation see Extended Data Table 2. **B**, UMAP representation colored by cluster (top) or condition (bottom). **C**, Cluster ratios between conditions for each cluster. **D**, Spatial representation of each cluster, top graph shows distribution in experimental area, bottom shows intratumor control.

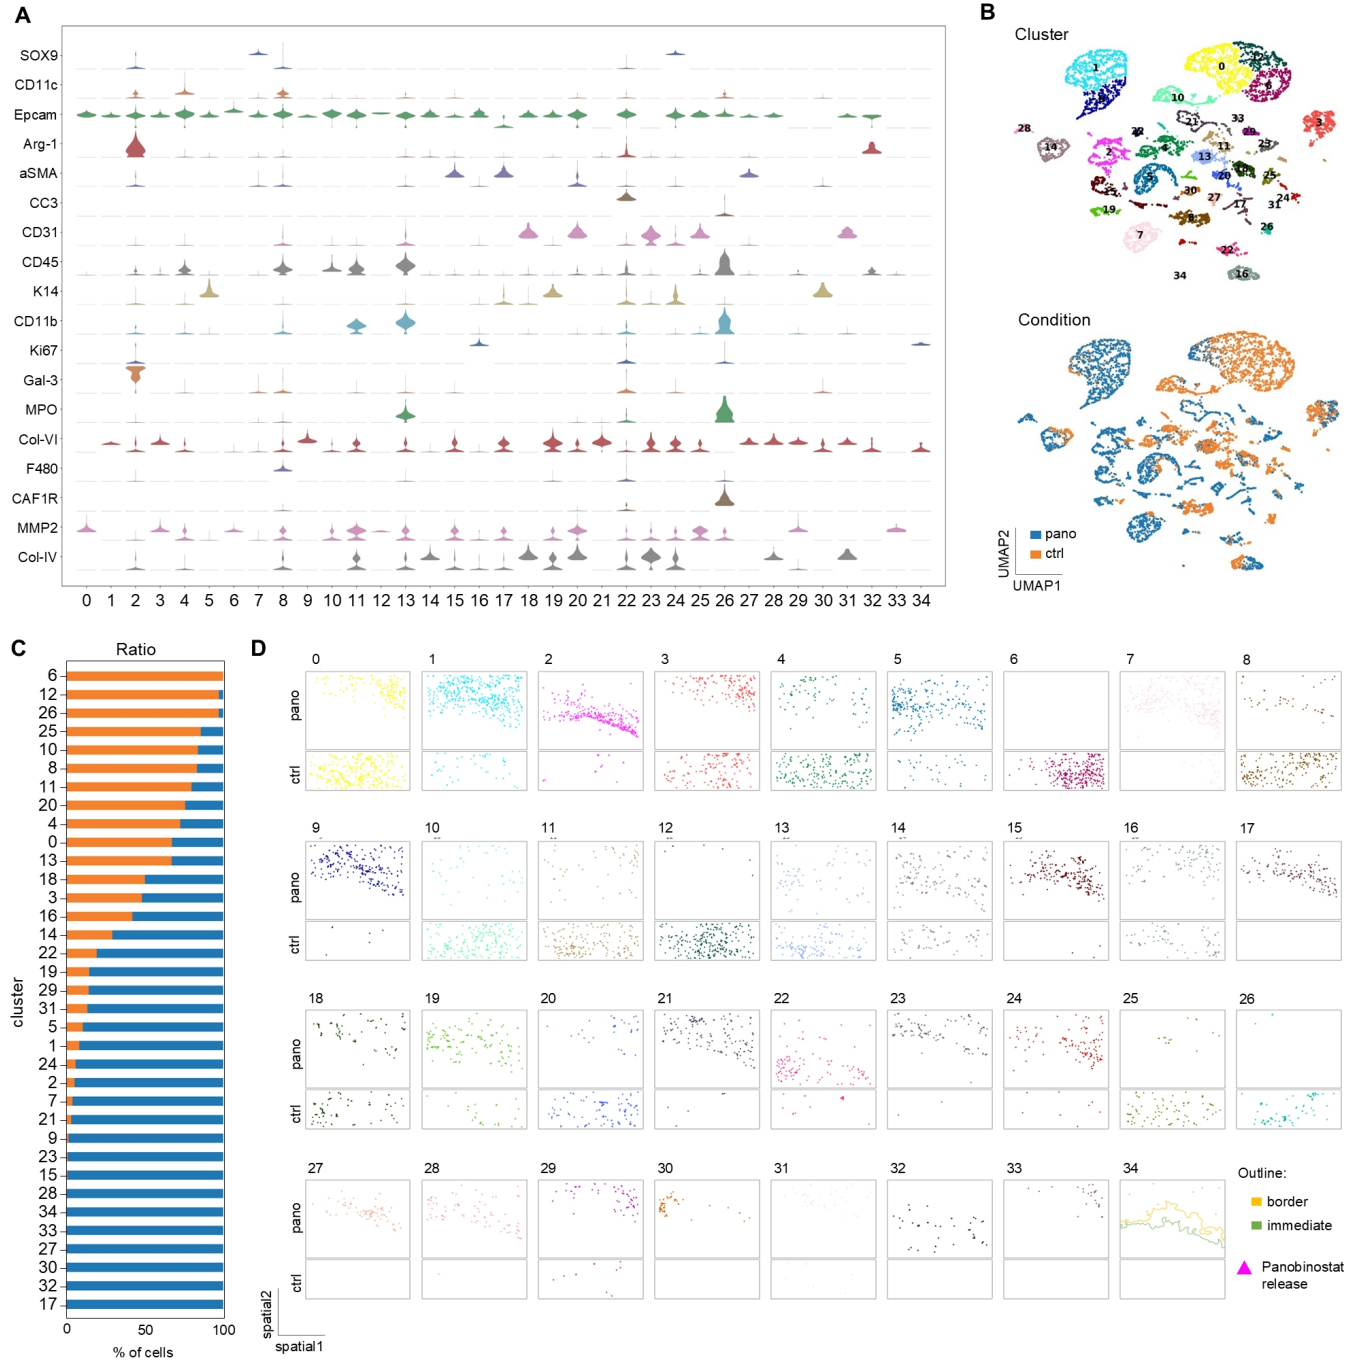

**Supplementary Figure 10 | Differential unsupervised clustering facilitated discovery of multi-marker combinations in replicate 4.** **A**, Violin plot denoting marker expression in each cluster from unsupervised cluster analysis, for full annotation see Extended Data Table 3. **B**, UMAP representation colored by cluster (top) or condition (bottom). **C**, Cluster ratios between conditions for each cluster. **D**, Spatial representation of each cluster, top graph shows distribution in experimental area, bottom shows intratumor control.

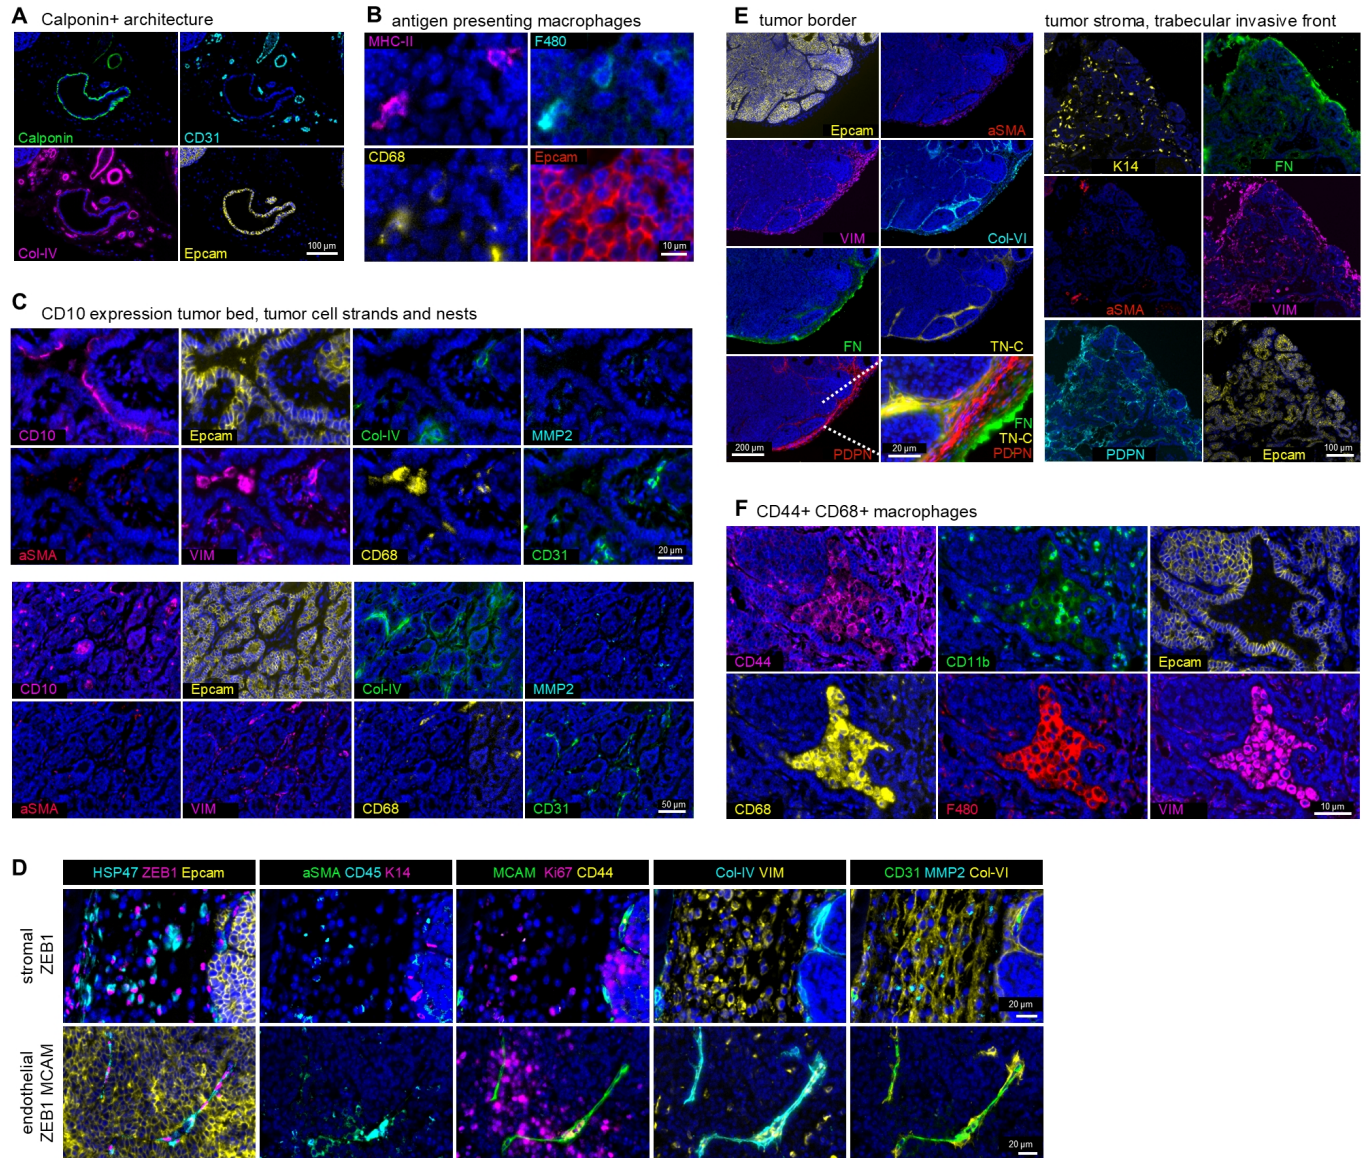

**Supplementary Figure 11 | Extended panel for fibroblast subclassification representative staining of cyclic immunofluorescence.** **A**, Rare myoepithelial/contractile calponin architecture in peritumor. **B**, MHC-II positive antigen-presenting macrophages in the tumor bed. **C**, Polarized CD10 expression by aligned tumor cells (top) or inside the intercellular space of tumor nests (bottom). **D**, ZEB1 expression in stromal cells of round shape (top) and endothelial expression of ZEB1 and MCAM in the tumor bed (bottom). **E**, Respective fibroblast marker staining illustrating different subsets of fibroblasts and populations with shared expression. Tumor margins at the outmost periphery show highest Fibronectin expression levels. **F**, CD44+ CD68+ macrophage aggregate inside the tumor bed. Expression of cytoskeletal VIM protein and CD44 might indicate cell migration capacities. Scale bars as indicated in the images.

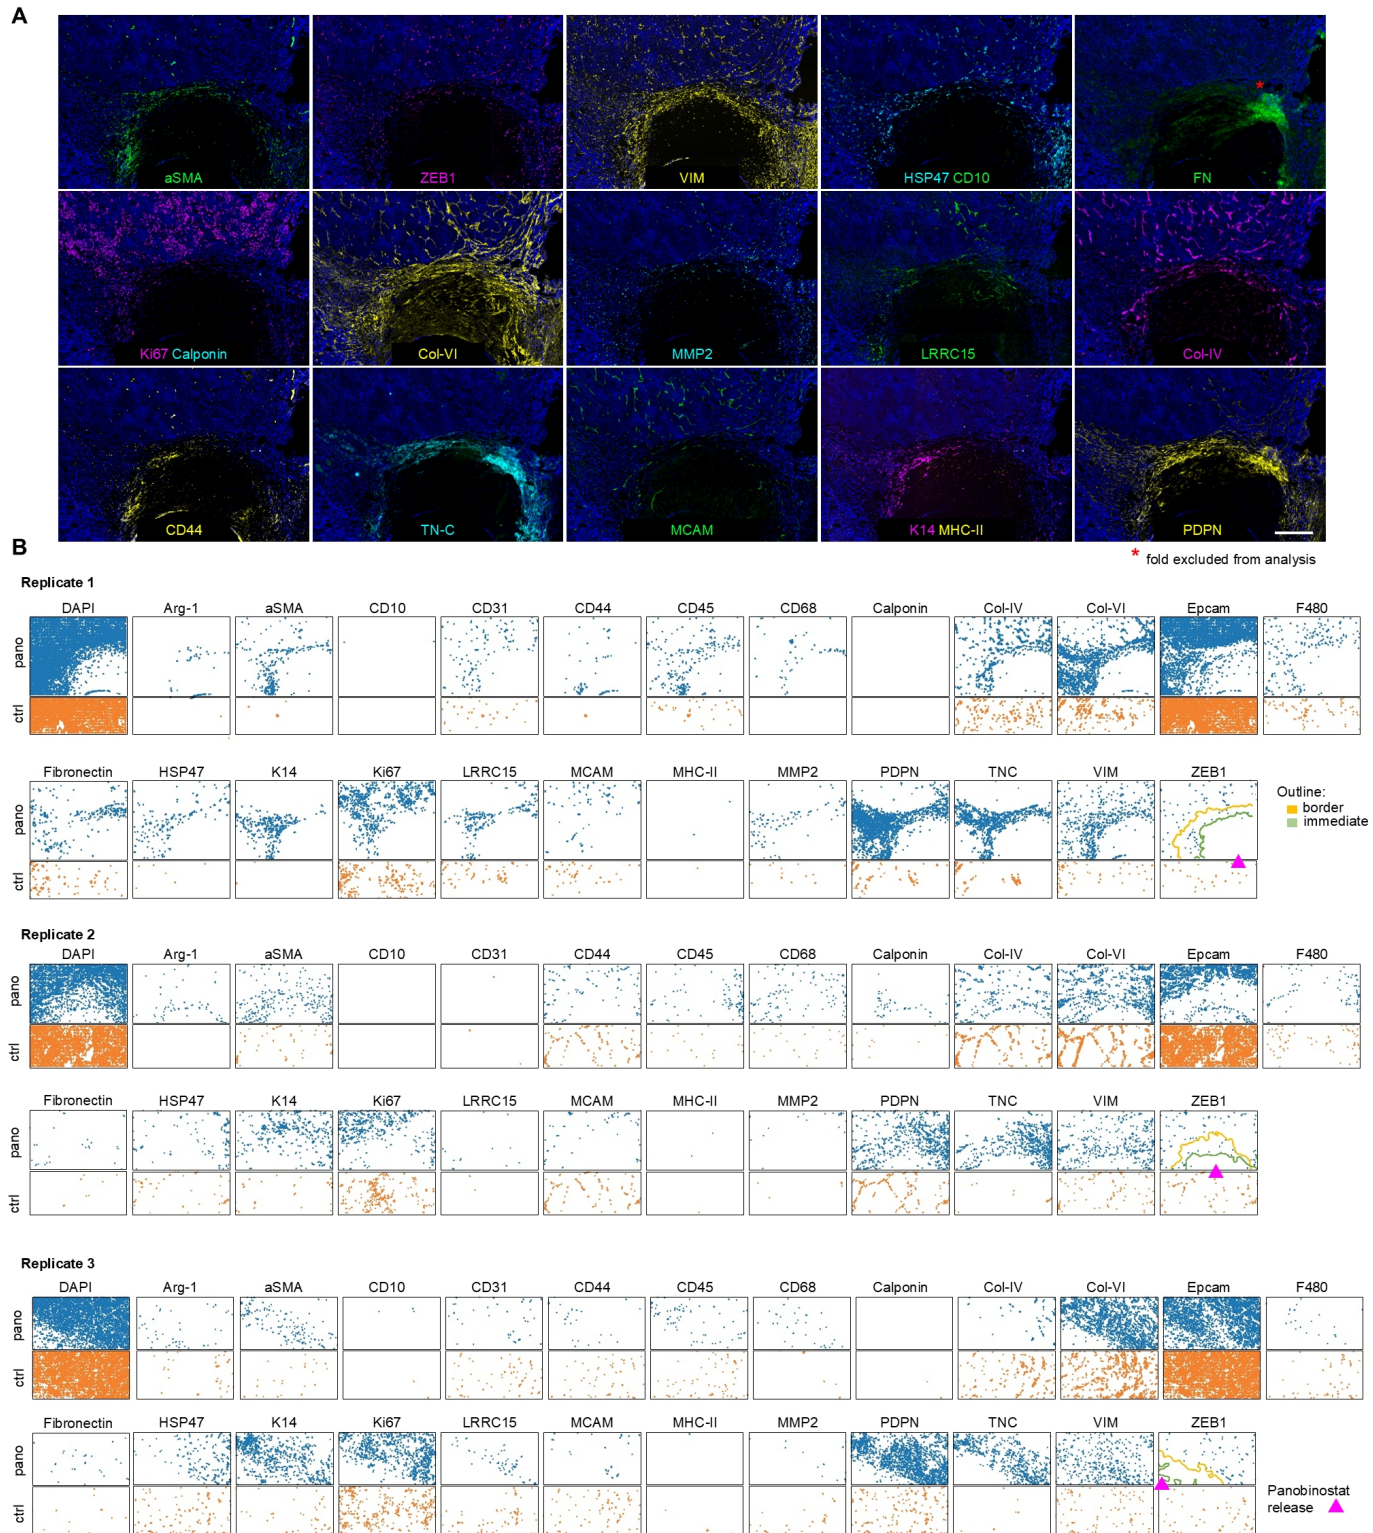

**Supplementary Figure 12 | Distribution of extended panel markers in MMTV-PyMT panobinostat treated region. A,** Representative staining images of a representative tissue section surrounding the implantable microdevice containing panobinostat for eight days stained with cyclF, panel of antibodies listed in Fig. 4a. Scale bar: 200  $\mu$ m. **B,** Representative DNA (DAPI nuclear stain, total cells) and selected target marker expression in xy-space, dots equal marker-positive cells in three replicates. Magenta triangle indicates drug release upwards.

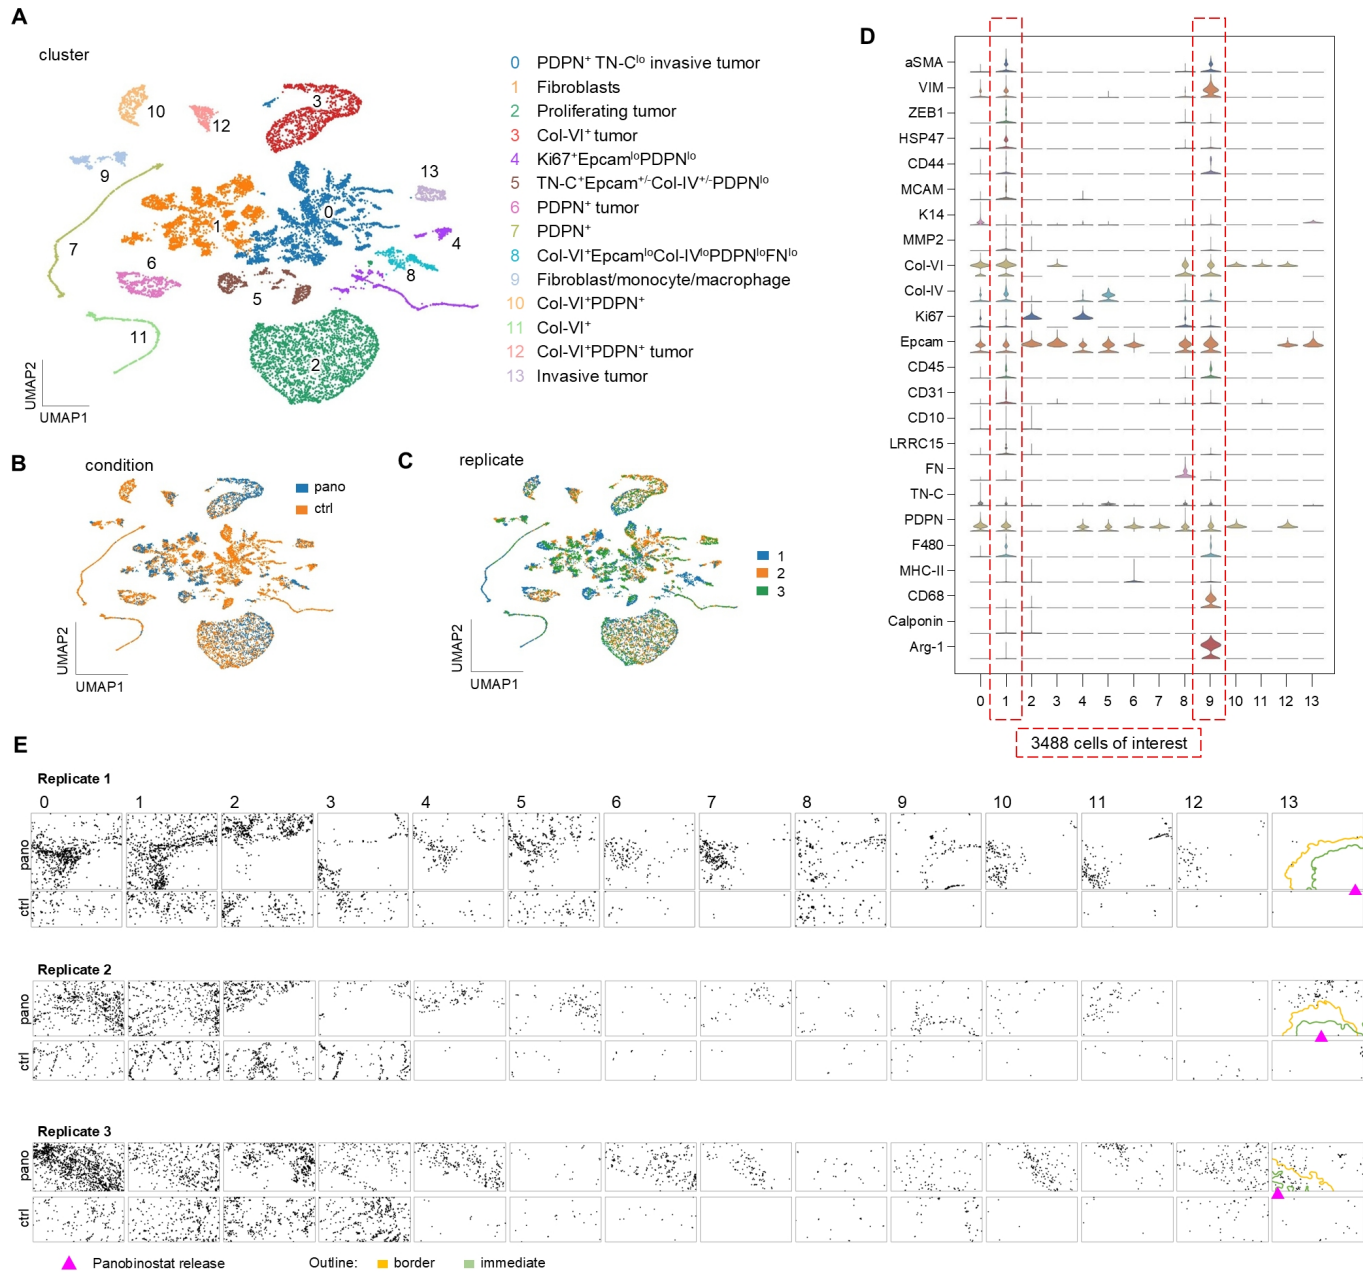

**Supplementary Figure 13 | Unsupervised clustering of the extended panel fibroblast data set. A-C,** UMAP representations of clustering of 14800 cells merged from three replicates colored by cluster (A.), condition (B.) and replicate (C.). Clustering parameters were  $n\_neighbors=100$ , resolution = 0.075 and were chosen to get a broad overview over the data to select the fibroblast and macrophage clusters of interest. **D,** Marker expression (depicted as violin plots) for unsupervised clusters. Cluster 1 and 9 were selected for subclustering (Fig. 4, Fig. 1S4). **E,** Spatial representation of clusters in three replicates. Top and bottom graph illustrate distribution in panobinostat-affected and random intratumor control, respectively.

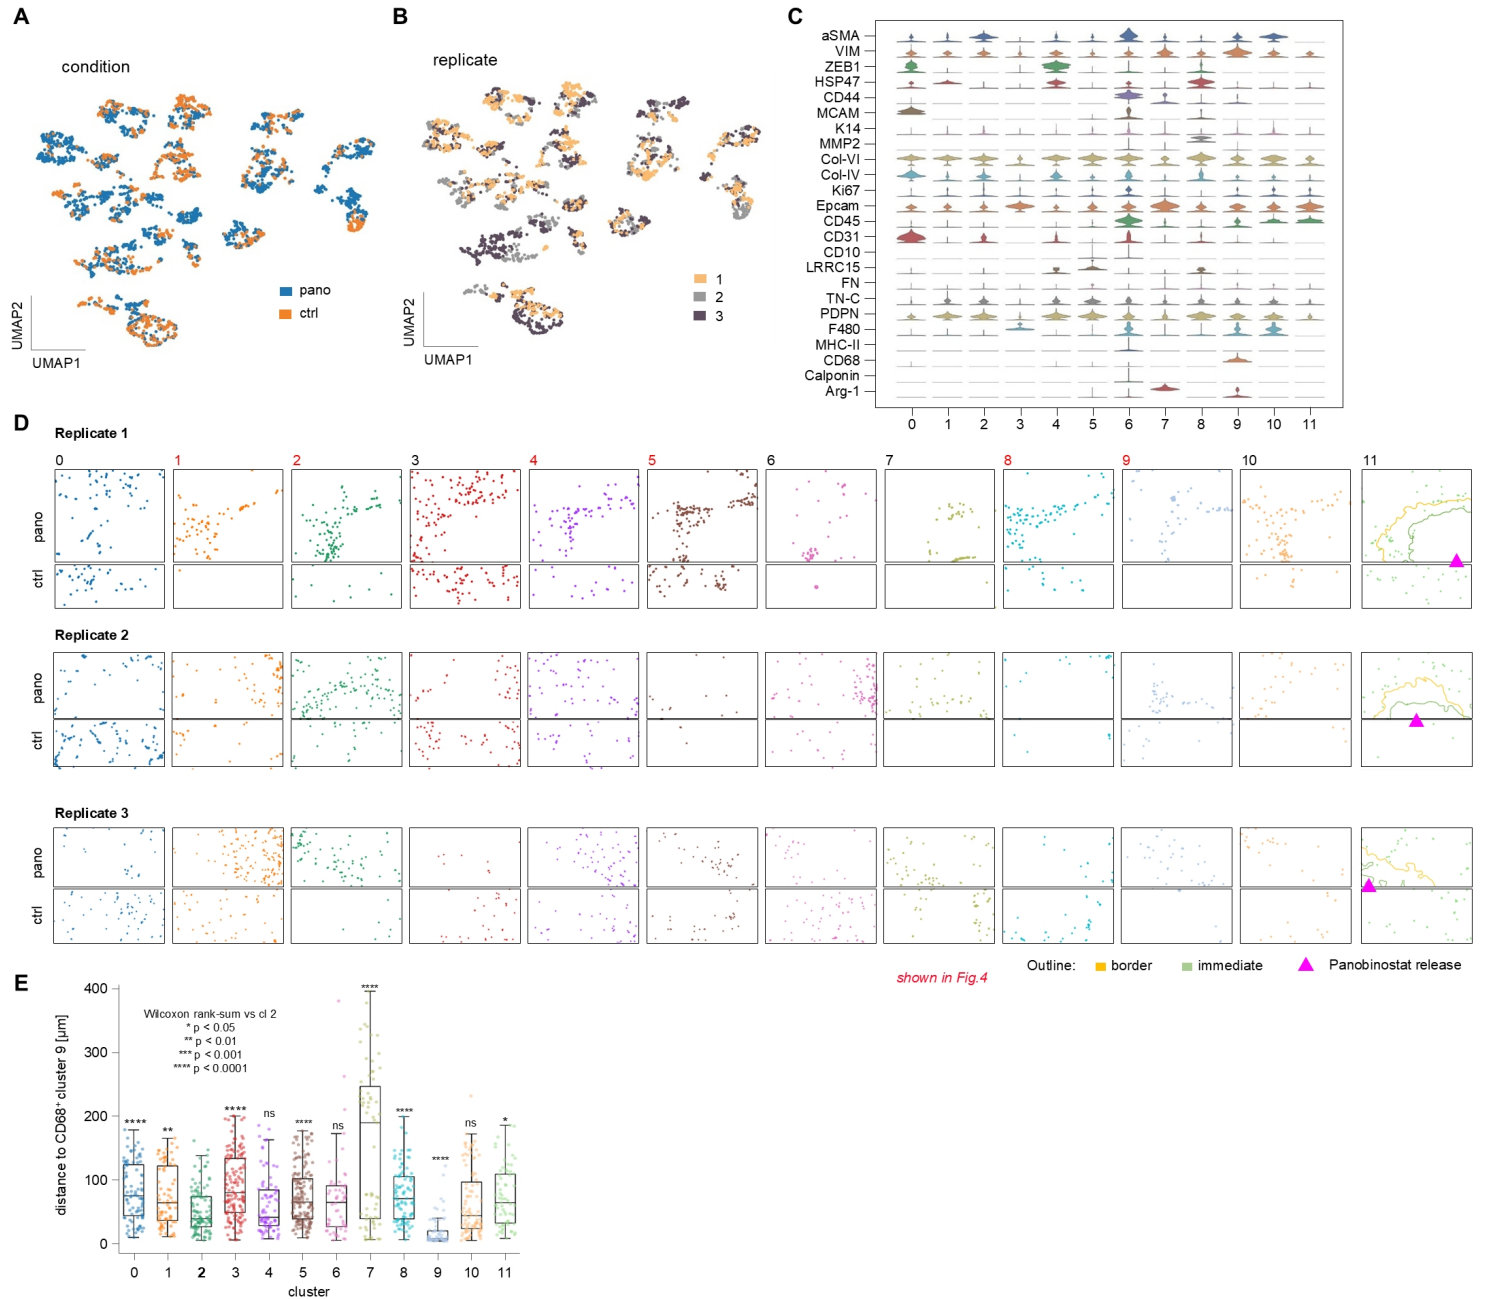

**Supplementary Figure 14 | Unsupervised subclustering of the fibroblast-associated clusters.** **A-B**, UMAP representations of clustering of 3488 cells merged from three replicates colored by condition (A.) and replicate (B.). Clustering parameters were  $n\_neighbors=15$ ,  $resolution=0.05$  and were chosen to get a broad overview over the data to select the fibroblast and macrophage clusters of interest. **C**, Marker expression (depicted as violin plots) for unsupervised clusters. Top and bottom graph illustrate distribution in panobinostat-affected and random intratumor control, respectively. **D**, Spatial representation of clusters in three replicates. Top and bottom graph illustrate distribution in panobinostat-affected and random intratumor control, respectively. **E**, Boxplots showing distance quantification of each cell per cluster to the closest CD68+ macrophage (of cluster 9) in replicate 1. The box shows the median and the quartiles of the distribution, whiskers correspond to 1.5 interquartile range of the lower and upper quartile; outliers are exempt. Pairwise comparisons against cluster 2 distribution were determined using a two-sided Wilcoxon rank-sum test. Parts of this figure are shown in Main Fig. 4, essentials are highlighted in red.

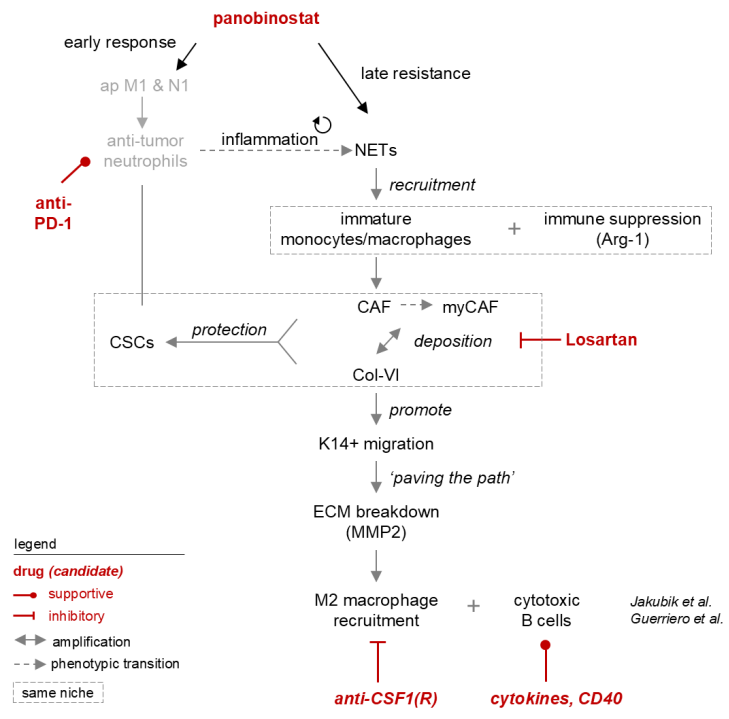

**Supplementary Figure 15 | Flow diagram depicting hypothesized sequence of events induced by prolonged panobinostat stimulus.** Line flow diagram of a proposed panobinostat mechanism of action at a late timepoint determined by MIMA in this study and targetable axis with proposed drug candidate. Phenotypes in grey color (early response mechanisms) have been derived from three-day implant studies conducted previously and tested successfully in vivo (Tatarova et al., 2022; Jakubik et al., under review). Other phenotypes derived from eight-day implantation in this study. Targeting the macrophage axis and B cells (*italic*) have been identified and tested (macrophages only) in the literature (Guerrero et al., 2017; Jakubik et al., under review) but not as part of this study. Legend in figure itself.

| Target     | Clone       | Origin  | Vendor                    |
|------------|-------------|---------|---------------------------|
| SOX9       | D8G8H       | Rabbit  | Cell Signaling Technology |
| CD11c      | D1V9Y       | Rabbit  | Cell Signaling Technology |
| Epcam      | R002        | Rabbit  | Sino Biological           |
| Arg-1      | D4E3M       | Rabbit  | Cell Signaling Technology |
| CD8        | 4S145       | Rabbit  | Invitrogen                |
| aSMA       | D4K9N       | Rabbit  | Cell Signaling Technology |
| CD3        | D4V8L       | Rabbit  | Cell Signaling Technology |
| CC3 Asp175 | D3E9        | Rabbit  | Cell Signaling Technology |
| CD31       | EPR17260    | Rabbit  | Abcam                     |
| CD31       | D8V9E       | Rabbit  | Cell Signaling Technology |
| CD45       |             | Rabbit  |                           |
| CD45       | D3F8Q       | Rabbit  | Cell Signaling Technology |
| K14        | EPR17350    | Rabbit  | Abcam                     |
| CD11b      |             | Rabbit  | Abcam                     |
| Ki67       | D3B5        | Rabbit  | Cell Signaling Technology |
| FoxP3      | polyclonal  | Rabbit  | Novus Biologicals         |
| Gal-3      | M3/38       | Rat     | Biolegend                 |
| MPO        | polyclonal  | Goat    | R&D systems               |
| Col-VI     | EPR17072    | Rabbit  | Abcam                     |
| F480       | D2S9R       | Rabbit  | Cell Signaling Technology |
| CSF1R      | Polyclonal  | Rabbit  | Sino Biological           |
| MMP2       | EPR1184     | Rabbit  | Abcam                     |
| Col-IV     | Polyclonal  | Rabbit  | MD Biosciences            |
| MHC-II     | M5/114.15.2 | Rat     | Biolegend                 |
| CD44       | E7K2Y       | Rabbit  | Cell Signaling Technology |
| CD10       | F4P6H       | Rabbit  | Cell Signaling Technology |
| ZEB1       | E2G6Y       | Rabbit  | Cell Signaling Technology |
| VIM        | D21H3       | Rabbit  | Cell Signaling Technology |
| HSP47      | EPR4217     | Rabbit  | Abcam                     |
| TN-C       | EPR4219     | Rabbit  | Abcam                     |
| FN         | F14         | Rabbit  | Abcam                     |
| Calponin   | D8L2T       | Rabbit  | Cell Signaling Technology |
| LRRC15     | E4X8J       | Rabbit  | Cell Signaling Technology |
| PDPN       | 8.1.1       | Hamster | Novus Biologicals         |
| MCAM       | E3F3E       | Rabbit  | Cell Signaling Technology |
| CD68       | E3O7V       | Rabbit  | Cell Signaling Technology |

**Supplementary Table 1 | Cyclic immunofluorescence antibodies.**

| Replicate 1 |                                                                                                                                                                                                                                            | Ratio |      |                                      |
|-------------|--------------------------------------------------------------------------------------------------------------------------------------------------------------------------------------------------------------------------------------------|-------|------|--------------------------------------|
| Cluster     | Marker combination                                                                                                                                                                                                                         | ctrl  | pano | Phenotype                            |
| 0           | Epcam <sup>+</sup> Gal-3 <sup>+</sup>                                                                                                                                                                                                      | 0     | 538  | Gal-3+ tumor                         |
| 1           | Epcam <sup>+</sup> CC3 <sup>+</sup> CD45 <sup>+</sup> /CD11b <sup>hi</sup> MPO <sup>hi</sup> Ki67 <sup>lo</sup> Col-VI <sup>lo</sup>                                                                                                       | 2     | 379  | Dying tumor (+cytotoxic neutrophils) |
| 2           | CD45 <sup>hi</sup> CD11b <sup>hi</sup> MPO <sup>+</sup> Epcam <sup>+</sup> /Arg-1 <sup>lo</sup> Gal-3 <sup>lo</sup> Col-VI <sup>lo</sup>                                                                                                   | 45    | 335  | Col-VI+ cytotoxic neutrophils        |
| 3           | CD45 <sup>+</sup> Epcam <sup>+</sup> CD11c <sup>+</sup> Gal-3 <sup>hi</sup> Arg-1 <sup>lo</sup> Col-VI <sup>lo</sup>                                                                                                                       | 105   | 210  | Dendritic cells                      |
| 4           | Epcam <sup>+</sup> Gal-3 <sup>+</sup> Arg-1 <sup>lo</sup> K14 <sup>lo</sup> CD11b <sup>lo</sup>                                                                                                                                            | 10    | 302  | Gal-3+ tumor                         |
| 5           | CD31 <sup>+</sup> Epcam <sup>+</sup> /Col-IV <sup>+</sup> Col-VI <sup>+</sup> /-                                                                                                                                                           | 82    | 219  | Col-VI+Col-IV+Epcam+ endothelium     |
| 6           | Epcam <sup>+</sup> Col-VI <sup>+</sup> Arg-1 <sup>lo</sup>                                                                                                                                                                                 | 116   | 175  | Col-VI+ tumor                        |
| 7           | Epcam <sup>+</sup> MMP2 <sup>+</sup>                                                                                                                                                                                                       | 33    | 257  | MMP2+ tumor                          |
| 8           | MMP2 <sup>+</sup> Col-VI <sup>+</sup>                                                                                                                                                                                                      | 15    | 265  | Col-VI+ MMP2+                        |
| 9           | Epcam <sup>+</sup> K14 <sup>hi</sup> Col-VI <sup>lo</sup> Gal-3 <sup>lo</sup>                                                                                                                                                              | 0     | 279  | Col-VI invasive tumor                |
| 10          | Col-VI <sup>+</sup> Gal-3 <sup>+</sup> /K14 <sup>lo</sup> Arg-1 <sup>lo</sup>                                                                                                                                                              | 14    | 244  | Col-VI                               |
| 11          | Epcam <sup>+</sup> SOX9 <sup>+</sup> Arg-1 <sup>lo</sup> K14 <sup>hi</sup> Gal-3 <sup>lo</sup>                                                                                                                                             | 55    | 201  | Arg-1+K14+ cancer stem cells         |
| 12          | CD45 <sup>+</sup> Epcam <sup>+</sup> Arg-1 <sup>+</sup>                                                                                                                                                                                    | 224   | 19   | Arg-1+ Epcam+ leukocytes             |
| 13          | Epcam <sup>hi</sup> CD45 <sup>+</sup> /CD11b <sup>lo</sup> Col-VI <sup>+</sup> Fal-3 <sup>hi</sup> Arg-1 <sup>lo</sup> MPO <sup>lo</sup>                                                                                                   | 51    | 173  | Col-VI+ Epcam+ leukocytes            |
| 14          | Epcam <sup>+</sup> Ki67 <sup>+</sup>                                                                                                                                                                                                       | 19    | 205  | Proliferating tumor                  |
| 15          | Epcam <sup>+</sup> SOX9 <sup>+</sup>                                                                                                                                                                                                       | 2     | 216  | Cancer stem cells                    |
| 16          | Epcam <sup>+</sup> Cd45 <sup>hi</sup> F480 <sup>+</sup> Gal-3 <sup>lo</sup> Arg-1 <sup>lo</sup>                                                                                                                                            | 60    | 142  | Macrophages                          |
| 17          | Epcam <sup>+</sup> Col-VI <sup>+</sup>                                                                                                                                                                                                     | 60    | 125  | Col-VI+ tumor                        |
| 18          | Epcam <sup>hi</sup> CD31 <sup>hi</sup> Col-VI <sup>hi</sup> MMP2 <sup>hi</sup>                                                                                                                                                             | 53    | 130  | Col-VI+MMP2+Epcam+ endothelium       |
| 19          | Epcam <sup>+</sup> Arg-1 <sup>+</sup> Ki67 <sup>+</sup>                                                                                                                                                                                    | 146   | 29   | Arg-1+ proliferating tumor           |
| 20          | Epcam <sup>+</sup> CD45 <sup>+</sup> /CD11c <sup>+</sup> F480 <sup>hi</sup> SOX9 <sup>+</sup> /Col-VI <sup>lo</sup> Arg-1 <sup>lo</sup> CD11b <sup>lo</sup> Gal-3 <sup>lo</sup> Col-IV <sup>lo</sup>                                       | 22    | 151  | F480+ dendritic cells                |
| 21          | Epcam <sup>+</sup> /CD45 <sup>hi</sup> CD11b <sup>lo</sup> CSF1R <sup>+</sup> F480 <sup>lo</sup> MPO <sup>lo</sup> Gal-3 <sup>lo</sup> CD11c <sup>lo</sup> CC3 <sup>lo</sup>                                                               | 19    | 133  | CSF1R+ macrophages                   |
| 22          | Col-VI <sup>+</sup>                                                                                                                                                                                                                        | 12    | 135  | Col-VI                               |
| 23          | Epcam <sup>+</sup> K14 <sup>+</sup>                                                                                                                                                                                                        | 1     | 125  | Invasive tumor                       |
| 24          | MMP2 <sup>+</sup>                                                                                                                                                                                                                          | 15    | 107  | MMP2                                 |
| 25          | Epcam <sup>+</sup> Arg-1 <sup>+</sup> MMP2 <sup>+</sup>                                                                                                                                                                                    | 111   | 11   | MMP2+ Arg-1+ tumor                   |
| 26          | Epcam <sup>+</sup> CD45 <sup>hi</sup> CD31 <sup>lo</sup> Gal-3 <sup>lo</sup>                                                                                                                                                               | 29    | 88   | Epcam+ leukocytes                    |
| 27          | Col-VI <sup>+</sup>                                                                                                                                                                                                                        | 7     | 98   | Col-VI                               |
| 28          | aSMA <sup>+</sup> Epcam <sup>hi</sup> Col-VI <sup>hi</sup> SOX9 <sup>lo</sup> CD11c <sup>lo</sup> CD31 <sup>lo</sup> F480 <sup>lo</sup> Col-IV <sup>lo</sup> Gal-3 <sup>lo</sup> Ki67 <sup>lo</sup> CD11b <sup>lo</sup> CD45 <sup>lo</sup> | 0     | 101  | Mesenchymal cells/EMT                |
| 29          | Epcam <sup>+</sup> CD31 <sup>+</sup> Arg-1 <sup>+</sup> Col-IV <sup>+</sup>                                                                                                                                                                | 96    | 1    | Col-IV+ Arg-1+ endothelium           |
| 30          | CD31 <sup>+</sup> Epcam <sup>+</sup> /Col-IV <sup>+</sup> MMP2 <sup>+</sup> Col-VI <sup>hi</sup>                                                                                                                                           | 12    | 79   | Col-VI+Col-IV+MMP2+ endothelium      |
| 31          | SOX9 <sup>+</sup> K14 <sup>lo</sup>                                                                                                                                                                                                        | 0     | 51   | Cancer stem cells                    |
| 32          | Epcam <sup>hi</sup> MMP2 <sup>+</sup> Col-IV <sup>+</sup> Col-VI <sup>hi</sup> Arg-1 <sup>lo</sup>                                                                                                                                         | 14    | 37   | MMP2+ Col-IV+ Col-VI+ tumor          |
| 33          | Arg-1 <sup>+</sup>                                                                                                                                                                                                                         | 31    | 11   | Arg-1                                |
| 34          | Epcam <sup>+</sup> CD31 <sup>+</sup> Arg-1 <sup>+</sup>                                                                                                                                                                                    | 31    | 2    | Epcam+ Arg-1+ endothelium            |
| Replicate 2 |                                                                                                                                                                                                                                            | Ratio |      |                                      |
| Cluster     | Marker combination                                                                                                                                                                                                                         | ctrl  | pano | Phenotype                            |
| 0           | Epcam <sup>+</sup> Ki67 <sup>+</sup>                                                                                                                                                                                                       | 616   | 154  | Proliferating tumor                  |
| 1           | Epcam <sup>+</sup> Ki67 <sup>+</sup>                                                                                                                                                                                                       | 203   | 382  | Proliferating tumor                  |
| 2           | Epcam <sup>+</sup> Ki67 <sup>+</sup>                                                                                                                                                                                                       | 403   | 116  | Proliferating tumor                  |
| 3           | MMP2 <sup>+</sup> Col-VI <sup>+</sup>                                                                                                                                                                                                      | 3     | 404  | Col-VI+ MMP2+                        |
| 4           | Epcam <sup>+</sup> Col-VI <sup>+</sup>                                                                                                                                                                                                     | 93    | 312  | Col-VI+ tumor                        |
| 5           | CD45 <sup>hi</sup> CD11b <sup>hi</sup> MPO <sup>hi</sup> Col-VI <sup>hi</sup> Epcam <sup>+</sup> /MMP2 <sup>lo</sup> Col-IV <sup>lo</sup>                                                                                                  | 12    | 379  | Col-VI+ cytotoxic neutrophils        |
| 6           | CD45 <sup>+</sup> Epcam <sup>+</sup> /Gal-3 <sup>hi</sup> Col-VI <sup>+</sup> Ki67 <sup>lo</sup>                                                                                                                                           | 105   | 234  | Gal-3+Epcam+Col-VI+ leukocytes       |
| 7           | Epcam <sup>hi</sup> CD45 <sup>hi</sup> CD11c <sup>+</sup> CD11b <sup>lo</sup> Gal-3 <sup>lo</sup> Col-VI <sup>lo</sup> MMP2 <sup>lo</sup> Col-IV <sup>lo</sup> Ki67 <sup>lo</sup>                                                          | 232   | 103  | Dendritic cells                      |
| 8           | Epcam <sup>+</sup> Arg-1 <sup>+</sup> Gal-3 <sup>lo</sup> MPO <sup>lo</sup> CD11b <sup>lo</sup> Col-VI <sup>lo</sup> CD45 <sup>lo</sup>                                                                                                    | 46    | 266  | Arg-1+ tumor                         |
| 9           | Epcam <sup>+</sup> CD31 <sup>+</sup> Col-VI <sup>hi</sup> Col-IV <sup>+</sup> MMP2 <sup>lo</sup> Ki67 <sup>lo</sup>                                                                                                                        | 234   | 51   | Col-VI+Col-IV+Epcam+ endothelium     |
| 10          | Epcam <sup>+</sup> Col-VI <sup>+</sup> MMP2 <sup>+</sup>                                                                                                                                                                                   | 5     | 278  | Col-VI+ MMP2+ tumor                  |
| 11          | Epcam <sup>+</sup> K14 <sup>+</sup>                                                                                                                                                                                                        | 7     | 272  | Invasive tumor                       |
| 12          | Epcam <sup>+</sup> /K14 <sup>hi</sup> Col-VI <sup>hi</sup> MMP2 <sup>lo</sup>                                                                                                                                                              | 1     | 270  | Col-VI+MMP2+ Invasive tumor          |
| 13          | Epcam <sup>hi</sup> CD45 <sup>+</sup> /F480 <sup>+</sup> CD11c <sup>hi</sup> CD11b <sup>lo</sup> Gal-3 <sup>hi</sup> Col-VI <sup>lo</sup> MMP2 <sup>lo</sup> Col-IV <sup>lo</sup> Arg-1 <sup>lo</sup>                                      | 38    | 198  | F480+ dendritic cells                |
| 14          | CD31 <sup>hi</sup> Col-VI <sup>hi</sup> MMP2 <sup>+</sup> Col-IV <sup>+</sup>                                                                                                                                                              | 8     | 211  | Col-VI+Col-IV+MMP2+ endothelium      |
| 15          | Epcam <sup>hi</sup> Col-VI <sup>hi</sup> Col-IV <sup>+</sup>                                                                                                                                                                               | 97    | 106  | Col-VI+Col-IV+ tumor                 |
| 16          | Epcam <sup>+</sup> MMP2 <sup>+</sup>                                                                                                                                                                                                       | 0     | 199  | MMP2+ tumor                          |
| 17          | aSMA <sup>+</sup> Epcam <sup>hi</sup> Col-VI <sup>hi</sup> Col-IV <sup>hi</sup> MMP2 <sup>lo</sup> Gal-3 <sup>lo</sup> CD45 <sup>lo</sup> CD31 <sup>lo</sup>                                                                               | 52    | 133  | Mesenchymal cells/EMT                |
| 18          | Ki67 <sup>+</sup>                                                                                                                                                                                                                          | 4     | 179  | Proliferation                        |
| 19          | Epcam <sup>+</sup> CD45 <sup>+</sup>                                                                                                                                                                                                       | 172   | 10   | Epcam+ leukocytes                    |
| 20          | Epcam <sup>hi</sup> SOX9 <sup>+</sup> aSMA <sup>lo</sup> Col-VI <sup>lo</sup> Arg-1 <sup>lo</sup> CD11b <sup>lo</sup> Ki67 <sup>lo</sup> F480 <sup>lo</sup> Col-IV <sup>lo</sup> CD11c <sup>lo</sup> CD31 <sup>lo</sup>                    | 5     | 176  | Cancer stem cells                    |
| 21          | CD31 <sup>+</sup> Col-VI <sup>hi</sup> Col-IV <sup>+</sup>                                                                                                                                                                                 | 19    | 160  | Col-VI+Col-IV+ endothelium           |
| 22          | Epcam <sup>+</sup> Col-IV <sup>+</sup>                                                                                                                                                                                                     | 153   | 25   | Col-IV+ tumor                        |
| 23          |                                                                                                                                                                                                                                            | 56    | 122  | background                           |
| 24          | Epcam <sup>+</sup> Gal-3 <sup>+</sup>                                                                                                                                                                                                      | 44    | 115  | Gal-3+ tumor                         |
| 25          | Epcam <sup>+</sup> K14 <sup>+</sup> /Ki67 <sup>+</sup> Col-VI <sup>lo</sup>                                                                                                                                                                | 18    | 126  | Proliferating invasive tumor         |
| 26          | Col-VI <sup>+</sup>                                                                                                                                                                                                                        | 20    | 105  | Col-VI                               |
| 27          | Epcam <sup>+</sup> /Ki67 <sup>+</sup> MMP2 <sup>+</sup>                                                                                                                                                                                    | 5     | 117  | MMP2+ proliferating tumor            |
| 28          | Epcam <sup>+</sup> CC3 <sup>+</sup> CD11c <sup>lo</sup> CD31 <sup>lo</sup> CD45 <sup>lo</sup> CD11b <sup>lo</sup> Ki67 <sup>lo</sup> MPO <sup>lo</sup> Col-VI <sup>lo</sup> F480 <sup>lo</sup> MMP2 <sup>lo</sup> Col-IV <sup>lo</sup>     | 29    | 79   | Dying tumor                          |
| 29          | Epcam <sup>+</sup> CD45 <sup>+</sup> Col-VI <sup>hi</sup> Col-IV <sup>+</sup> CD11b <sup>lo</sup>                                                                                                                                          | 33    | 61   | Col-VI+Col-IV+Epcam+ leukocytes      |
| 30          | K14 <sup>+</sup>                                                                                                                                                                                                                           | 0     | 90   | Invasion                             |
| 31          | Epcam <sup>+</sup> Ki67 <sup>+</sup> Col-IV <sup>+</sup> Col-VI <sup>lo</sup>                                                                                                                                                              | 73    | 15   | Col-IV+ proliferating tumor          |
| 32          | K14 <sup>hi</sup> MMP2 <sup>+</sup> Col-IV <sup>hi</sup> Col-VI <sup>+</sup>                                                                                                                                                               | 1     | 75   | MMP2+Col-IV+Col-VI+ invasive tumor   |
| 33          | Col-VI <sup>+</sup>                                                                                                                                                                                                                        | 3     | 62   | Col-VI                               |
| 34          | Epcam <sup>+</sup> CD45 <sup>+</sup> CSF1R <sup>+</sup> CD11c <sup>+</sup> Gal-3 <sup>lo</sup> Ki67 <sup>lo</sup>                                                                                                                          | 53    | 4    | CSF1R+ DC                            |
| 35          | Ki67 <sup>+</sup> Col-VI <sup>+</sup>                                                                                                                                                                                                      | 1     | 12   | Ki67+Col-VI+                         |
| 36          | Epcam <sup>+</sup> Ki67 <sup>+</sup> Col-VI <sup>+</sup> MMP2 <sup>+</sup>                                                                                                                                                                 | 0     | 11   | MMP2+Col-VI+ proliferating tumor     |

**Supplementary Table 2 | Cluster marker combinations for 4 replicates.** The table states each cluster, the proportion of control and panobinostat cells and the annotation.

| Replicate 3 |                                                                                                                                                                                                                 | ctrl | pano | Phenotype                        |
|-------------|-----------------------------------------------------------------------------------------------------------------------------------------------------------------------------------------------------------------|------|------|----------------------------------|
| Cluster     | Marker combination                                                                                                                                                                                              |      |      |                                  |
| 0           | Epcam <sup>+</sup> Ki67 <sup>+</sup>                                                                                                                                                                            | 218  | 292  | Proliferating tumor              |
| 1           | Epcam <sup>+</sup> Col-VI <sup>+</sup>                                                                                                                                                                          | 203  | 252  | Col-VI tumor                     |
| 2           | Epcam <sup>+</sup> Ki67 <sup>+</sup>                                                                                                                                                                            | 167  | 201  | Proliferating tumor              |
| 3           | CD31 <sup>+</sup> Col-VI <sup>+</sup> Col-IV <sup>+</sup> MMP2 <sup>+/−</sup>                                                                                                                                   | 158  | 177  | Col-VI+Col-IV+MMP2+ endothelium  |
| 4           | MMP2 <sup>+</sup> Col-VI <sup>+</sup>                                                                                                                                                                           | 57   | 276  | Col-VI+ MMP2+                    |
| 5           | Epcam <sup>hi</sup> K14 <sup>+</sup> Col-VI <sup>lo</sup>                                                                                                                                                       | 23   | 275  | Col-VI+ invasive tumor           |
| 6           | Epcam <sup>+</sup> K14 <sup>+</sup>                                                                                                                                                                             | 7    | 266  | Invasive tumor                   |
| 7           | CD45 <sup>hi</sup> CD11c <sup>+</sup> Col-VI <sup>lo</sup>                                                                                                                                                      | 167  | 101  | Dendritic cells                  |
| 8           | Epcam <sup>+</sup> CD45 <sup>+</sup>                                                                                                                                                                            | 231  | 24   | Epcam+ leukocytes                |
| 9           | CD45 <sup>+</sup> CD11b <sup>+</sup> MPO <sup>hi</sup> Epcam <sup>+/−</sup> Col-VI <sup>hi</sup> MMP2 <sup>lo</sup> Col-IV <sup>o</sup>                                                                         | 10   | 242  | Col-VI+ cytotoxic neutrophils    |
| 10          | Epcam <sup>+</sup> Arg-1 <sup>+</sup> Gal-3 <sup>hi</sup> Col-VI <sup>lo</sup> Col-IV <sup>o</sup>                                                                                                              | 0    | 247  | Arg-1+Gal-3+ tumor               |
| 11          | Epcam <sup>+</sup> Col-VI <sup>+</sup> MMP2 <sup>+</sup>                                                                                                                                                        | 72   | 154  | Col-VI+ MMP2+ tumor              |
| 12          | CD45 <sup>+</sup> Epcam <sup>+/−</sup> Col-VI <sup>+/−</sup> Ki67 <sup>lo</sup>                                                                                                                                 | 158  | 62   | Col-VI+Epcam+ leukocytes         |
| 13          | Epcam <sup>+</sup> SOX9 <sup>+</sup> Col-VI <sup>lo</sup> CD31 <sup>lo</sup> Col-IV <sup>o</sup> MMP2 <sup>lo</sup> CC3 <sup>lo</sup>                                                                           | 25   | 182  | Cancer stem cells                |
| 14          | Epcam <sup>+</sup> MMP2 <sup>+</sup>                                                                                                                                                                            | 29   | 173  | MMP2+ tumor                      |
| 15          | Col-VI <sup>+</sup>                                                                                                                                                                                             | 92   | 77   | Col-VI                           |
| 16          | Epcam <sup>+</sup> Gal-3 <sup>hi</sup> Col-VI <sup>+/−</sup> Col-IV <sup>o</sup> MMP2 <sup>lo</sup> CD11c <sup>o</sup>                                                                                          | 5    | 159  | Gal-3+Col-VI+ tumor              |
| 17          | aSMA <sup>+</sup> Epcam <sup>hi</sup> SOX9 <sup>hi</sup> CD31 <sup>hi</sup> Col-IV <sup>hi</sup> Col-VI <sup>hi</sup> CC3 <sup>+/−</sup> Ki67 <sup>lo</sup> F480 <sup>lo</sup> Gal-3 <sup>lo</sup>              | 39   | 124  | Mesenchymal cells/EMT            |
| 18          | Epcam <sup>+</sup> Ki67 <sup>+</sup>                                                                                                                                                                            | 36   | 125  | Proliferating tumor              |
| 19          | Epcam <sup>hi</sup> CD45 <sup>hi</sup> F480 <sup>+</sup> Col-VI <sup>lo</sup> MMP2 <sup>lo</sup> Col-IV <sup>o</sup>                                                                                            | 61   | 92   | Macrophages                      |
| 20          | Epcam <sup>+</sup> CD45 <sup>hi</sup> CD11c <sup>+</sup> F480 <sup>+</sup> SOX9 <sup>lo</sup>                                                                                                                   | 74   | 77   | F480+ dendritic cells            |
| 21          | Epcam <sup>+</sup> Col-VI <sup>+</sup>                                                                                                                                                                          | 92   | 55   | Col-VI tumor                     |
| 22          | Epcam <sup>+</sup> CC3 <sup>+</sup> F480 <sup>lo</sup>                                                                                                                                                          | 49   | 93   | Dying tumor                      |
| 23          | CD31 <sup>hi</sup> Epcam <sup>+</sup> Col-IV <sup>+</sup> Col-VI <sup>hi</sup>                                                                                                                                  | 75   | 66   | Col-VI+Col-IV+Epcam+ endothelium |
| 24          | CD31 <sup>hi</sup> Epcam <sup>lo</sup> Col-VI <sup>hi</sup> Ki67 <sup>lo</sup>                                                                                                                                  | 58   | 63   | Col-VI+ endothelium              |
| 25          | Col-VI <sup>+</sup>                                                                                                                                                                                             | 50   | 60   | Col-VI                           |
| 26          | CD45 <sup>hi</sup> Epcam <sup>hi</sup> MPO <sup>+</sup> Col-VI <sup>lo</sup>                                                                                                                                    | 6    | 93   | Col-VI+ cytotoxic neutrophils    |
| 27          | Ki67 <sup>+</sup>                                                                                                                                                                                               | 51   | 45   | Proliferation                    |
| 28          | CD45 <sup>hi</sup> Epcam <sup>+/−</sup> CSF1R <sup>+</sup> F480 <sup>+/−</sup> CD11c <sup>lo</sup> CD11b <sup>lo</sup> MPO <sup>lo</sup> Col-VI <sup>lo</sup> MMP2 <sup>lo</sup>                                | 60   | 35   | CSF1R+ macrophages               |
| 29          | CD45 <sup>lo</sup> MMP2 <sup>+</sup> Col-VI <sup>lo</sup>                                                                                                                                                       | 32   | 60   | MMP2+ leukocytes                 |
| 30          | Ki67 <sup>+</sup>                                                                                                                                                                                               | 38   | 48   | Proliferation                    |
| 31          | Col-VI <sup>+</sup>                                                                                                                                                                                             | 31   | 42   | Col-VI                           |
| 32          | Col-VI+Col-IV+                                                                                                                                                                                                  | 35   | 27   | Col-VI+Col-IV+                   |
| 33          | CD31 <sup>+</sup> MMP2 <sup>+</sup> Col-VI <sup>hi</sup> Epcam <sup>lo</sup>                                                                                                                                    | 4    | 56   | Col-VI+MMP2+ endothelium         |
| 34          | Col-VI+MMP2+Col-IV+                                                                                                                                                                                             | 10   | 23   | Col-VI+ MMP2+                    |
| 35          | SOX9+                                                                                                                                                                                                           | 2    | 17   | Cancer stem cells                |
| 36          | SOX9 <sup>+</sup> Epcam <sup>+</sup> Arg-1 <sup>+</sup> K14 <sup>+/−</sup>                                                                                                                                      | 0    | 18   | Arg-1+K14+ cancer stem cells     |
| Replicate 4 |                                                                                                                                                                                                                 | ctrl | pano | Phenotype                        |
| Cluster     | Marker combination                                                                                                                                                                                              |      |      |                                  |
| 0           | Epcam <sup>+</sup> MMP2 <sup>+</sup>                                                                                                                                                                            | 367  | 176  | MMP2+ tumor                      |
| 1           | Epcam <sup>+</sup> Col-VI <sup>+</sup>                                                                                                                                                                          | 46   | 478  | Col-VI+ tumor                    |
| 2           | Epcam <sup>+</sup> Gal-3 <sup>+</sup> Arg-1 <sup>+</sup> CD11c <sup>lo</sup>                                                                                                                                    | 24   | 384  | Arg-1+Gal-3+ tumor               |
| 3           | Epcam <sup>+</sup> Col-VI <sup>+</sup> MMP2 <sup>+</sup>                                                                                                                                                        | 179  | 190  | Col-VI+MMP2+ tumor               |
| 4           | Epcam <sup>+</sup> CD45 <sup>hi</sup> CD11c <sup>+</sup> Col-VI <sup>lo</sup> MMP2 <sup>lo</sup>                                                                                                                | 252  | 95   | Dendritic cells                  |
| 5           | Epcam <sup>+</sup> K14 <sup>+</sup>                                                                                                                                                                             | 38   | 304  | Invasive tumor                   |
| 6           | Epcam <sup>+</sup> MMP2 <sup>+</sup>                                                                                                                                                                            | 329  | 0    | MMP2+ tumor                      |
| 7           | Epcam <sup>+</sup> SOX9 <sup>+</sup>                                                                                                                                                                            | 14   | 299  | Cancer stem cells                |
| 8           | Epcam <sup>+</sup> CD45 <sup>hi</sup> F480 <sup>+</sup> CD11c <sup>hi</sup> MMP2 <sup>lo</sup> Col-VI <sup>lo</sup> Col-IV <sup>o</sup>                                                                         | 250  | 50   | F480+ dendritic cells            |
| 9           | Epcam <sup>+</sup> Col-VI <sup>+</sup>                                                                                                                                                                          | 6    | 284  | Col-VI+ tumor                    |
| 10          | Epcam <sup>+</sup> CD45 <sup>+</sup> MMP2 <sup>lo</sup>                                                                                                                                                         | 230  | 44   | Epcam+ leukocytes                |
| 11          | Epcam <sup>+</sup> CD45 <sup>+</sup> CD11b <sup>+</sup> MMP2 <sup>+/−</sup> Col-VI <sup>lo</sup> Col-IV <sup>o</sup>                                                                                            | 203  | 51   | Epcam+ myeloid cells             |
| 12          | Epcam <sup>+</sup> MMP2 <sup>+</sup>                                                                                                                                                                            | 245  | 7    | MMP2+ tumor                      |
| 13          | Epcam <sup>+</sup> CD45 <sup>hi</sup> CD11b <sup>hi</sup> MPO <sup>+</sup> Col-VI <sup>lo</sup> MMP2 <sup>lo</sup>                                                                                              | 167  | 81   | Cytotoxic neutrophils            |
| 14          | Epcam <sup>+</sup> Col-IV <sup>+</sup>                                                                                                                                                                          | 71   | 168  | Col-IV+ tumor                    |
| 15          | Epcam <sup>+</sup> aSMA <sup>+</sup> Col-VI <sup>lo</sup> MMP2 <sup>lo</sup>                                                                                                                                    | 3    | 235  | EMT                              |
| 16          | Epcam <sup>+</sup> Ki67 <sup>+</sup>                                                                                                                                                                            | 81   | 110  | Proliferating tumor              |
| 17          | aSMA <sup>+</sup> Col-VI <sup>+/−</sup> MMP2 <sup>lo</sup>                                                                                                                                                      | 0    | 190  | Col-VI+ mesenchymal cells        |
| 18          | Epcam <sup>+</sup> CD31 <sup>+</sup> Col-IV <sup>+</sup>                                                                                                                                                        | 87   | 86   | Col-IV+Epcam+ endothelium        |
| 19          | Epcam <sup>+</sup> K14 <sup>+</sup> Col-VI <sup>hi</sup> Col-IV <sup>o</sup> MMP2 <sup>lo</sup>                                                                                                                 | 25   | 140  | Col-VI+ invasive tumor           |
| 20          | Epcam <sup>+</sup> CD31 <sup>+</sup> Col-IV <sup>+</sup> MMP2 <sup>+</sup> Col-VI <sup>lo</sup>                                                                                                                 | 123  | 39   | Col-IV+MMP2+Epcam+ endothelium   |
| 21          | Col-VI <sup>+</sup>                                                                                                                                                                                             | 6    | 153  | Col-VI                           |
| 22          | Epcam <sup>+</sup> CC3 <sup>+</sup> CD45 <sup>o</sup> CD22b <sup>lo</sup> Ki67 <sup>lo</sup> Gal-3 <sup>lo</sup> MPO <sup>lo</sup> F480 <sup>lo</sup> MMP2 <sup>lo</sup> Col-IV <sup>o</sup> Arg-1 <sup>o</sup> | 28   | 113  | Dying tumor                      |
| 23          | CD31 <sup>hi</sup> Col-IV <sup>+</sup> Col-VI <sup>lo</sup>                                                                                                                                                     | 2    | 129  | Col-VI+Col-IV+ endothelium       |
| 24          | Epcam <sup>+</sup> SOX9 <sup>+</sup> K14 <sup>lo</sup> Col-VI <sup>lo</sup> Col-IV <sup>o</sup> MMP2 <sup>lo</sup>                                                                                              | 8    | 116  | K14+ stem cells                  |
| 25          | Epcam <sup>+</sup> CD31 <sup>+</sup> MMP2 <sup>+/−</sup>                                                                                                                                                        | 91   | 15   | MMP2+ endothelium                |
| 26          | CD45 <sup>+</sup> CD11b <sup>+</sup> MPO <sup>hi</sup> CSF1R <sup>+</sup> CD11c <sup>o</sup> MMP2 <sup>lo</sup>                                                                                                 | 101  | 3    | CSF1R+ myeloid cells             |
| 27          | Epcam <sup>+</sup> aSMA <sup>+</sup> Col-VI <sup>+</sup>                                                                                                                                                        | 0    | 85   | Col-VI+ EMT                      |
| 28          | Epcam <sup>+</sup> Col-VI <sup>+</sup> Col-IV <sup>+</sup>                                                                                                                                                      | 1    | 82   | Col-VI+Col-IV+ tumor             |
| 29          | Col-VI <sup>+</sup> MMP2 <sup>+</sup>                                                                                                                                                                           | 11   | 63   | Col-VI+ MMP2+                    |
| 30          | K14 <sup>+</sup> Col-IV <sup>o</sup>                                                                                                                                                                            | 0    | 65   | Invasion                         |
| 31          | Epcam <sup>+</sup> CD31 <sup>+</sup> Col-VI <sup>+</sup> Col-IV <sup>+</sup>                                                                                                                                    | 8    | 49   | Col-VI+Col-IV+Epcam+ endothelium |
| 32          | Epcam <sup>+</sup> Arg-1 <sup>+</sup> CD45 <sup>o</sup> Col-VI <sup>o</sup>                                                                                                                                     | 0    | 44   | Arg-1+ tumor                     |
| 33          | MMP2 <sup>+</sup>                                                                                                                                                                                               | 0    | 27   | MMP2                             |
| 34          | Ki67 <sup>+</sup> Col-VI <sup>lo</sup>                                                                                                                                                                          | 0    | 8    | Ki67+Col-VI+                     |

**Supplementary Table 2 | Cluster marker combinations for 4 replicates.** The table states each cluster, the proportion of control and panobinostat cells and the annotation (continued).

|                          | d0     | d3     | d7      | d10     | d17     | d21     | d24     |
|--------------------------|--------|--------|---------|---------|---------|---------|---------|
| <b>Control + IgG2a</b>   | 386.89 | 683.79 | 951.27  | 1318.23 | 1895.34 | 2468.8  | 3026.18 |
|                          | 364.84 | 623.71 | 987.13  | 1464.18 | 1967.21 | 2491.01 | 3200.07 |
|                          | 406.96 | 693.34 | 1264.64 | 1690.72 | 2125.67 | 2446.18 | 2864.1  |
|                          | 210.65 | 327.21 | 788.66  | 1109.94 | 1657.05 | 2220.18 | 2624.11 |
|                          | 207.12 | 499.91 | 777.13  | 1144.87 | 1546.11 | 1926.2  | 2362.33 |
|                          | 261.07 | 404.42 | 603.31  | 1029.68 | 1648.28 | 2253.3  | 2753.73 |
|                          | 177.34 | 284.97 | 424.54  | 753.1   | 1331.32 | 1866.53 | 2398.58 |
|                          | 208.58 | 353.69 | 580.65  | 915.67  | 1576.44 | 2098.4  | 2563.43 |
| <b>Pano + IgG2a</b>      | 399.91 | 726.61 | 913.99  | 1389.1  | 1602.96 | 2065.22 | 2490.89 |
|                          | 350.02 | 689.89 | 1200.97 | 1523.79 | 1983.65 | 2425.44 | 2944.83 |
|                          | 210.08 | 315.36 | 576.68  | 818.48  | 1043.12 | 1323.14 | 1861.67 |
|                          | 189.87 | 267.04 | 431.08  | 532.52  | 808.69  | 1010.44 | 1587.52 |
|                          | 413.63 | 680.65 | 1206.05 | 1766.76 | 2129.06 | 2488.21 | 3079.67 |
|                          | 217.93 | 353.58 | 708.3   | 1197.24 | 1745.48 | 1981.95 | 2476.16 |
|                          | 325.24 | 500.59 | 796.18  | 1103.07 | 1390.46 | 1826.17 | 2598.1  |
|                          | 200.29 | 336.81 | 418.04  | 734.04  | 1176.95 | 1465.55 | 1875.03 |
| <b>Pano + aPD1</b>       | 397.21 | 745.81 | 1030.2  | 1355.68 | 1525.06 | 1846.93 | 2223.16 |
|                          | 263.14 | 405.13 | 601.55  | 809.2   | 967.43  | 1119.41 | 1541.51 |
|                          | 512.55 | 710.3  | 1172.5  | 1317.66 | 1457.96 | 1790.12 | 2262.63 |
|                          | 205.68 | 255.12 | 465.18  | 522.36  | 604.96  | 783.93  | 1084.42 |
|                          | 134.78 | 237.17 | 338.43  | 578.52  | 805.57  | 1052.94 | 1462.85 |
|                          | 228.66 | 360    | 508.84  | 699.98  | 993.45  | 1354.11 | 1867.61 |
|                          | 290.28 | 439.76 | 625.43  | 835.9   | 944.4   | 1397.19 | 1875.29 |
|                          | 184.67 | 358.6  | 522.01  | 658.41  | 884.24  | 1216.49 | 1613.29 |
| <b>Pano + Los</b>        | 319.04 | 543.12 | 684.12  | 901.86  | 1074.07 | 1287.89 | 1550.23 |
|                          | 387.13 | 701.27 | 937.71  | 1135.87 | 1335.35 | 1722.36 | 2175.65 |
|                          | 167.21 | 232.91 | 313.51  | 478.65  | 663.62  | 763.44  | 1090.94 |
|                          | 471.83 | 585.43 | 938.56  | 1083.84 | 1385.88 | 1549.21 | 1840.22 |
|                          | 412.57 | 601.27 | 754.28  | 871.39  | 1190.24 | 1523.89 | 2080.7  |
|                          | 193.5  | 434.45 | 626.73  | 829.68  | 1142.55 | 1514.63 | 1936.79 |
|                          | 241.93 | 316.76 | 413.15  | 630.3   | 1082.08 | 1372.56 | 1743.33 |
|                          | 190.9  | 306.55 | 497.14  | 663.28  | 1179.17 | 1598.02 | 2086.2  |
| <b>Pano + aPD1 + Los</b> | 320.83 | 436.1  | 537.58  | 609.73  | 793.16  | 935.42  | 1216.78 |
|                          | 440.58 | 610.71 | 731.88  | 804.54  | 895.19  | 973.12  | 1208.83 |
|                          | 179.38 | 290.16 | 367.39  | 471.92  | 526.23  | 702.97  | 882.07  |
|                          | 287.89 | 559.93 | 789.99  | 902.46  | 1186.66 | 1338.17 | 1679.31 |
|                          | 211.88 | 390.47 | 525.2   | 615.42  | 915.57  | 1147.54 | 1357.41 |
|                          | 209.93 | 315.01 | 362.22  | 410.35  | 562.49  | 676.27  | 931.25  |
|                          | 190.36 | 272.23 | 321.87  | 401.01  | 555.48  | 665.75  | 755.04  |
|                          | 237.88 | 348.53 | 430.61  | 508.17  | 665.55  | 761.73  | 878.19  |

**Supplementary Table 3 | Tumor measurement source data for Fig. 6C.** Tumor measurements of 8 mice per systemic treatment group. Volume is given in mm<sup>3</sup> and endpoint was defined as one measurement above 2500 mm<sup>3</sup>. Pano, panobinostat; Los, Losartan.
